# Supplementary material for: Selective formation of C–N and CN bonds via C(sp3)–H activation of isochroman in the presence of DTBP
Source: Royal Society of Chemistry journal article supplement (doi:10.1039/c4qo00293h), 2014-12-09
Supplement: c4qo00293h1.pdf [file c4qo00293h1.pdf]

**Supporting information**  
**Facile approach for C(sp<sup>3</sup>)-H bond thioetherification of**  
**isochroman**

Jie Feng<sup>a</sup> Guoping Lu<sup>a</sup> and Chun Cai<sup>a\*</sup>

<sup>a</sup> Chemical Engineering College, Nanjing University of Science & Technology, Nanjing,  
Jiangsu 210094, P. R. China

\* Corresponding Author E-mail: [c.cai@mail.njust.edu.cn](mailto:c.cai@mail.njust.edu.cn)

**Table of Contents**

|                                                                                          |          |
|------------------------------------------------------------------------------------------|----------|
| <b>1. General information</b>                                                            | <b>2</b> |
| <b>2. General procedures</b>                                                             | <b>2</b> |
| <b>3. Characterization Data</b>                                                          | <b>2</b> |
| <b>4. Copies of <sup>1</sup>H NMR, <sup>13</sup>C NMR and <sup>19</sup>F NMR Spectra</b> | <b>9</b> |

## 1 General information

All commercial materials were used without further purification. All known compounds are identified by appropriate technique such as  $^1\text{H}$  NMR,  $^{13}\text{C}$  NMR and compared with previously reported data. All unknown compounds are characterized by  $^1\text{H}$  NMR,  $^{13}\text{C}$  NMR, MS and elemental analyses. Analytical thin-layer chromatography are performed on glass plates precoated with silica gel impregnated with a fluorescent indicator (254 nm), and the plates are visualized by exposure to ultraviolet light. GC-MS analyses were performed on an Agilent 7890A-5975C instrument (Column: DB-5 MS). Mass spectra are taken on a Finnigan TSQ Quantum - MS instrument in the electrospray ionization (ESI) mode.  $^1\text{H}$  NMR and  $^{13}\text{C}$  NMR spectra are recorded on an AVANCE 500 Bruker spectrometer operating at 500 MHz and 125 MHz in  $\text{CDCl}_3$ , respectively, and chemical shifts are reported in ppm. Elemental analyses are performed on a Yanagimoto MT3CHN recorder. GC analyses are performed on an Agilent 7890A instrument (Column: Agilent 19091J-413: 30 m  $\times$  320  $\mu\text{m}$   $\times$  0.25  $\mu\text{m}$ , carrier gas:  $\text{H}_2$ , FID detection).

## 2 General procedures

### 2.1 General procedures for the oxidative C-N formation

A sealed tube was charged with isochroman(or benzylic ether)(1 mmol), DTBP(1.5 mmol), amine (or amide)(1.3 mmol). The reaction mixture was stirred at 120  $^\circ\text{C}$  for 16 h. Upon completion, The reaction mixture was then cooled to obtain brown liquid, The organic solutions could be purified directly by column chromatography on silica gel to give the pure product (hexane/ethyl acetate=20/1).

### 2.1 General procedures for the oxidative C=N formation

A sealed tube was charged with isochroman(or benzylic ether)(1 mmol), DTBP(3 mmol), amine (or amide)(1.3 mmol). The reaction mixture was stirred at 120  $^\circ\text{C}$  for 24 h. Upon completion, The reaction mixture was then cooled to obtain dark brown liquid, The organic solutions could be purified directly by column chromatography on silica gel to give the pure product (hexane/ethyl acetate=20/1).

## 3 Characterization Data

$^1\text{H}$  NMR,  $^{13}\text{C}$  NMR,  $^{19}\text{F}$  NMR, Elemental analyses and MS data of all the isolated products **3a-3d**, **3f-3i**, **3l**, **3n**, **3o**, **3t**, **3x**, **4a-4c**, **4e** were given as below. The  $^1\text{H}$  NMR of **3u** and **3v** mixture was also given.

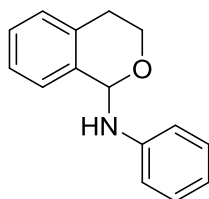Chemical Formula: C<sub>15</sub>H<sub>15</sub>NO

Exact Mass: 225.12

Elemental Analysis: C, 79.97; H, 6.71; N, 6.22; O, 7.10

*N*-phenylisochroman-1-amine **3a** <sup>1</sup>H NMR (500 MHz, CDCl<sub>3</sub>) δ 7.30 (t, *J* = 7.1 Hz, 1H), 7.28 – 7.22 (m, 4H), 7.17 (d, *J* = 7.4 Hz, 1H), 6.88 (d, *J* = 8.2 Hz, 2H), 6.83 (t, *J* = 7.3 Hz, 1H), 6.07 (d, *J* = 7.7 Hz, 1H), 4.57 (d, *J* = 7.4 Hz, 1H), 4.16 (ddd, *J* = 12.0, 9.7, 4.0 Hz, 1H), 3.96 – 3.87 (m, 1H), 3.02 – 2.93 (m, 1H), 2.77 (dt, *J* = 16.5, 3.9 Hz, 1H). <sup>13</sup>C NMR (126 MHz, CDCl<sub>3</sub>) δ 145.82, 135.55, 135.08, 129.43, 129.00, 128.04, 126.88, 126.54, 119.02, 114.02, 80.37, 77.38, 77.13, 76.87, 58.45, 28.39. Anal. Calcd for C<sub>15</sub>H<sub>15</sub>NO: C, 79.97; H, 6.71. Found: C, 79.68; H, 6.54. MS (ESI) *m/z*: 225.

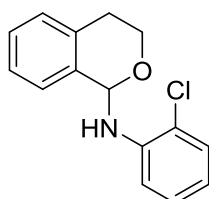Chemical Formula: C<sub>15</sub>H<sub>14</sub>ClNO

Exact Mass: 259.08

Elemental Analysis: C, 69.37; H, 5.43; Cl, 13.65; N, 5.39; O, 6.16

*N*-(2-chlorophenyl)isochroman-1-amine **3b** <sup>1</sup>H NMR (500 MHz, CDCl<sub>3</sub>) δ 7.37 – 7.27 (m, 4H), 7.26 – 7.20 (m, 3H), 6.84 – 6.75 (m, 1H), 6.11 (d, *J* = 7.3 Hz, 1H), 5.22 (d, *J* = 7.0 Hz, 1H), 4.24 – 4.14 (m, 1H), 3.95 (ddd, *J* = 11.6, 5.5, 3.6 Hz, 1H), 3.11 – 2.99 (m, 1H), 2.81 (dt, *J* = 16.5, 3.6 Hz, 1H). <sup>13</sup>C NMR (126 MHz, CDCl<sub>3</sub>) δ 141.04, 133.99, 133.93, 128.21, 127.99, 127.16, 126.91, 125.84, 125.67, 118.68, 118.08, 112.66, 78.95, 76.34, 76.08, 75.83, 57.34, 27.26. Anal. Calcd for C<sub>15</sub>H<sub>14</sub>ClNO: C, 69.37; H, 6.43. Found: C, 69.66; H, 6.14. MS (ESI) *m/z*: 259.

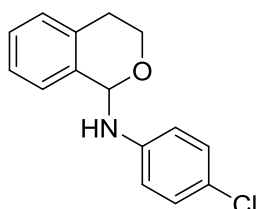Chemical Formula: C<sub>15</sub>H<sub>14</sub>ClNO

Exact Mass: 259.08

Elemental Analysis: C, 69.37; H, 5.43; Cl, 13.65; N, 5.39; O, 6.16

*N*-(4-chlorophenyl)isochroman-1-amine **3c** <sup>1</sup>H NMR (500 MHz, CDCl<sub>3</sub>) δ 7.30 – 7.22 (m, 3H), 7.17 (t, *J* = 7.9 Hz, 3H), 6.80 (d, *J* = 8.8 Hz, 2H), 6.00 (d, *J* = 7.6 Hz, 1H), 4.57 (d, *J* = 7.4 Hz, 1H), 4.18 – 4.06 (m, 1H), 3.94 – 3.86 (m, 1H), 3.01 – 2.91 (m, 1H), 2.77 (dt, *J* = 16.6, 3.9 Hz, 1H). <sup>13</sup>C NMR (126 MHz, CDCl<sub>3</sub>) δ 143.30, 134.06, 133.94, 128.15, 127.95, 127.09, 125.67, 125.50, 122.63, 114.18, 79.33, 76.27, 76.02, 75.76, 57.46, 27.23. Anal. Calcd for C<sub>15</sub>H<sub>14</sub>ClNO: C, 69.37; H, 5.43. Found: C, 69.64; H, 5.55. MS (ESI) *m/z*: 259.

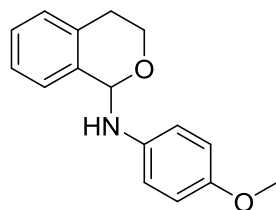Chemical Formula: C<sub>16</sub>H<sub>17</sub>NO<sub>2</sub>

Exact Mass: 255.13

Elemental Analysis: C, 75.27; H, 6.71; N, 5.49; O, 12.53

N-(4-methoxyphenyl)isochroman-1-amine **3d** <sup>1</sup>H NMR (500 MHz, CDCl<sub>3</sub>) δ 7.34 (d, *J* = 7.4 Hz, 1H), 7.27 – 7.21 (m, 2H), 7.17 (d, *J* = 7.3 Hz, 1H), 6.85 (s, 4H), 6.01 (s, 1H), 4.24 – 4.11 (m, 1H), 3.92 (dt, *J* = 11.5, 4.8 Hz, 1H), 3.79 (s, 3H), 3.01 – 2.92 (m, 1H), 2.79 (dt, *J* = 16.5, 4.1 Hz, 1H). <sup>13</sup>C NMR (126 MHz, CDCl<sub>3</sub>) δ 158.62, 133.77, 133.00, 132.81, 127.76, 126.62, 126.11, 125.00, 113.53, 85.95, 76.28, 76.02, 75.77, 57.07, 54.36, 26.83. Anal. Calcd for C<sub>16</sub>H<sub>17</sub>NO<sub>2</sub>: C, 75.27; H, 6.71. Found: C, 75.04; H, 6.53. MS (ESI) *m/z*: 255.

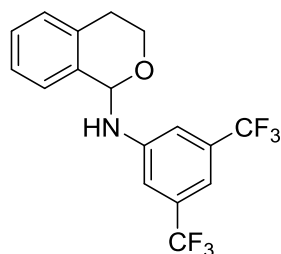Chemical Formula: C<sub>17</sub>H<sub>13</sub>F<sub>6</sub>NO

Exact Mass: 361.09

Elemental Analysis: C, 56.52; H, 3.63; F, 31.55; N, 3.88; O, 4.43

N-(3,5-bis(trifluoromethyl)phenyl)isochroman-1-amine **3f** <sup>1</sup>H NMR (500 MHz, CDCl<sub>3</sub>) δ 7.31 (dd, *J* = 9.3, 5.1 Hz, 2H), 7.28 – 7.23 (m, 4H), 7.19 (d, *J* = 7.4 Hz, 1H), 6.06 (d, *J* = 7.3 Hz, 1H), 4.97 (d, *J* = 7.0 Hz, 1H), 4.16 – 4.03 (m, 1H), 4.01 – 3.89 (m, 1H), 3.08 – 2.94 (m, 1H), 2.77 (dt, *J* = 16.6, 3.5 Hz, 1H). <sup>13</sup>C NMR (126 MHz, CDCl<sub>3</sub>) δ 146.66, 134.99, 134.15, 132.98, 132.72, 132.46, 132.20, 129.20, 128.54, 126.80, 126.62, 124.68, 122.51, 113.64, 112.10, 79.82, 58.62, 28.15. Anal. Calcd for C<sub>17</sub>H<sub>13</sub>F<sub>6</sub>NO: C, 56.52; H, 3.63. Found: C, 56.34; H, 3.50. MS (ESI) *m/z*: 361.

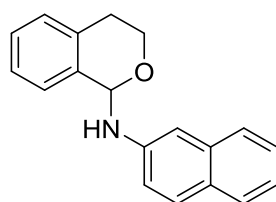Chemical Formula: C<sub>19</sub>H<sub>17</sub>NO

Exact Mass: 275.13

Elemental Analysis: C, 82.88; H, 6.22; N, 5.09; O, 5.81

N-(naphthalen-2-yl)isochroman-1-amine **3g** <sup>1</sup>H NMR (500 MHz, CDCl<sub>3</sub>) δ 7.83 (d, *J* = 8.0 Hz, 1H), 7.75 (d, *J* = 8.4 Hz, 1H), 7.51 – 7.36 (m, 5H), 7.30 (dd, *J* = 13.3, 6.8 Hz, 2H), 7.22 (d, *J* = 7.3 Hz, 2H), 6.24 (d, *J* = 7.3 Hz, 1H), 5.20 (d, *J* = 7.2 Hz, 1H), 4.22 (ddd, *J* = 11.7, 9.7, 4.0 Hz, 1H), 3.97 (ddd, *J* = 9.5, 4.5, 3.0 Hz, 1H), 3.07 – 2.98 (m, 1H), 2.86 – 2.78 (m, 1H). <sup>13</sup>C NMR (126 MHz, CDCl<sub>3</sub>) δ 140.02, 134.68, 134.12, 133.36, 127.97, 127.79, 127.33, 127.06, 125.97, 125.63, 125.20, 124.67, 123.93, 122.52, 118.86, 118.06, 106.38, 79.63, 76.26, 76.01, 75.76, 57.61, 27.36. Anal. Calcd for C<sub>19</sub>H<sub>17</sub>NO: C, 82.88; H, 6.22. Found: C, 82.54; H, 6.57. MS (ESI) *m/z*: 275.

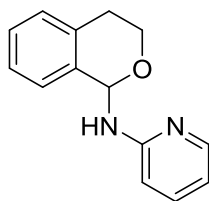

Chemical Formula: C<sub>14</sub>H<sub>14</sub>N<sub>2</sub>O  
 Exact Mass: 226.11  
 Elemental Analysis: C, 74.31; H, 6.24; N, 12.38; O, 7.07

N-(isochroman-1-yl)pyridin-2-amine **3h** <sup>1</sup>H NMR (500 MHz, CDCl<sub>3</sub>) δ 8.04 – 7.90 (m, 1H), 7.50 (dd, *J* = 10.7, 4.9 Hz, 1H), 7.29 (d, *J* = 7.6 Hz, 1H), 7.26 (t, *J* = 7.3 Hz, 1H), 7.23 – 7.19 (m, 1H), 7.15 (d, *J* = 7.5 Hz, 1H), 6.74 (d, *J* = 8.4 Hz, 1H), 6.70 – 6.61 (m, 1H), 6.27 (d, *J* = 8.1 Hz, 1H), 5.85 (d, *J* = 8.0 Hz, 1H), 4.13 – 4.08 (m, 1H), 3.97 – 3.86 (m, 1H), 3.02 – 2.90 (m, 1H), 2.75 (dd, *J* = 16.5, 2.3 Hz, 1H). <sup>13</sup>C NMR (126 MHz, CDCl<sub>3</sub>) δ 156.35, 147.18, 136.85, 133.92, 127.86, 126.95, 125.87, 125.49, 113.61, 106.53, 77.66, 57.85, 27.27. Anal. Calcd for C<sub>14</sub>H<sub>14</sub>N<sub>2</sub>O: C, 74.31; H, 6.24. Found: C, 74.62; H, 6.07. MS (ESI) *m/z*: 226.

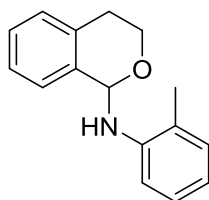

Chemical Formula: C<sub>16</sub>H<sub>17</sub>NO  
 Exact Mass: 239.13  
 Elemental Analysis: C, 80.30; H, 7.16; N, 5.85; O, 6.69

N-(o-tolyl)isochroman-1-amine **3i** <sup>1</sup>H NMR (500 MHz, CDCl<sub>3</sub>) δ 7.34 (d, *J* = 7.5 Hz, 1H), 7.28 (dt, *J* = 6.9, 4.5 Hz, 2H), 7.20 (d, *J* = 7.4 Hz, 2H), 7.15 (d, *J* = 8.0 Hz, 1H), 7.11 (d, *J* = 7.4 Hz, 1H), 6.79 (t, *J* = 7.3 Hz, 1H), 6.11 (d, *J* = 7.5 Hz, 1H), 4.42 (d, *J* = 7.3 Hz, 1H), 4.23 – 4.13 (m, 1H), 3.99 – 3.89 (m, 1H), 3.07 – 2.95 (m, 1H), 2.83 (s, 1H), 2.15 (s, 3H). <sup>13</sup>C NMR (126 MHz, CDCl<sub>3</sub>) δ 142.88, 134.76, 134.14, 129.29, 127.93, 126.95, 126.26, 125.81, 125.55, 121.29, 117.66, 111.11, 79.28, 76.30, 76.04, 75.79, 57.44, 27.38, 16.65. Anal. Calcd for C<sub>16</sub>H<sub>17</sub>NO: C, 80.30; H, 7.16. Found: C, 80.67; H, 6.97. MS (ESI) *m/z*: 239.

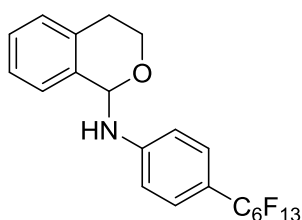

Chemical Formula: C<sub>21</sub>H<sub>14</sub>F<sub>13</sub>NO  
 Exact Mass: 543.09  
 Elemental Analysis: C, 46.42; H, 2.60; F, 45.46; N, 2.58; O, 2.94

N-(4-(6,6,6,6,6,6,6,6,6,6,6,6,6,6-tridecafluoro-6l16-hexa-1,3,5-triyn-1-yl)phenyl)isochroman-1-amine **3l** <sup>1</sup>H NMR (500 MHz, CDCl<sub>3</sub>) δ 7.39 (d, *J* = 8.6 Hz, 2H), 7.27 – 7.22 (m, 2H), 7.20 (d, *J* = 7.4 Hz, 1H), 7.14 (d, *J* = 7.4 Hz, 1H), 6.88 (d, *J* = 8.6 Hz, 2H), 6.04 (d, *J* = 6.6 Hz, 1H), 4.84 (d, *J* = 6.8 Hz, 1H), 4.13 – 4.03 (m, 1H), 3.89 (ddd, *J* = 11.6, 5.3, 3.9 Hz, 1H), 3.01 – 2.89 (m, 1H), 2.73 (dt, *J* = 16.5, 3.7 Hz, 1H). <sup>13</sup>C NMR (126 MHz, CDCl<sub>3</sub>) δ 148.66, 135.03, 134.68, 129.14, 128.35, 126.72, 118.63, 118.44, 114.30, 113.48, 79.72, 77.36, 77.11, 76.85, 58.62, 28.23. <sup>19</sup>F NMR (470 MHz, CDCl<sub>3</sub>) δ -80.73, -80.75, -80.77, -109.45, -109.47, -121.25, -121.85, -122.69, -126.09. Anal. Calcd for C<sub>21</sub>H<sub>14</sub>F<sub>13</sub>NO: C, 46.42; H, 2.60. Found: C, 46.53; H, 2.99. MS (ESI) *m/z*: 543.

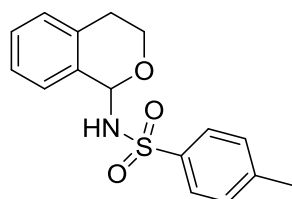Chemical Formula: C<sub>16</sub>H<sub>17</sub>NO<sub>3</sub>S

Exact Mass: 303.09

Elemental Analysis: C, 63.35; H, 5.65; N, 4.62; O, 15.82; S, 10.57

*N*-(isochroman-1-yl)-4-methylbenzenesulfonamide **3n** <sup>1</sup>H NMR (500 MHz, CDCl<sub>3</sub>) δ 7.85 (d, *J* = 8.2 Hz, 2H), 7.31 (d, *J* = 8.2 Hz, 2H), 7.21 (dt, *J* = 11.5, 3.8 Hz, 3H), 7.08 (d, *J* = 7.1 Hz, 1H), 6.10 (d, *J* = 8.5 Hz, 1H), 5.43 (d, *J* = 8.0 Hz, 1H), 3.73 – 3.58 (m, 2H), 2.89 – 2.79 (m, 1H), 2.61 (dt, *J* = 16.6, 3.6 Hz, 1H). <sup>13</sup>C NMR (126 MHz, CDCl<sub>3</sub>) δ 143.45, 138.90, 134.61, 132.94, 129.57, 128.93, 128.53, 127.32, 126.90, 126.83, 80.01, 58.87, 27.67, 21.67. Anal. Calcd for C<sub>16</sub>H<sub>17</sub>NO<sub>3</sub>S: C, 63.35; H, 5.65. Found: C, 63.71; H, 6.43. MS (ESI) *m/z*: 303.

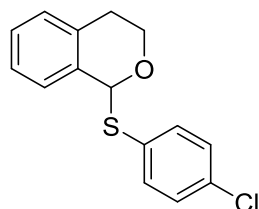

1-((4-chlorophenyl)thio)isochromane

Exact Mass: 276.04

Elemental Analysis: C, 65.09; H, 4.73; Cl, 12.81; O, 5.78; S, 11.58

1-((4-chlorophenyl)thio)isochromane **3o**. <sup>1</sup>H NMR (500 MHz, CDCl<sub>3</sub>) δ 7.56 (d, *J* = 8.3 Hz, 2H), 7.40 – 7.30 (m, 3H), 7.28 – 7.21 (m, 2H), 7.20 – 7.11 (m, 1H), 6.49 (s, 1H), 4.55 (td, *J* = 11.5, 3.3 Hz, 1H), 4.03 (dd, *J* = 11.3, 6.2 Hz, 1H), 3.20 – 3.09 (m, 1H), 2.72 (dd, *J* = 16.5, 2.4 Hz, 1H). <sup>13</sup>C NMR (126 MHz, CDCl<sub>3</sub>) δ 133.56, 132.90, 132.48, 132.27, 131.64, 128.06, 127.89, 126.93, 126.13, 125.16, 85.06, 76.39, 76.14, 75.89, 57.36, 26.75. Anal. Calcd for C<sub>15</sub>H<sub>13</sub>ClOS: C, 65.09; H, 4.73. Found: C, 64.88; H, 4.64. MS (ESI) *m/z*: 276.

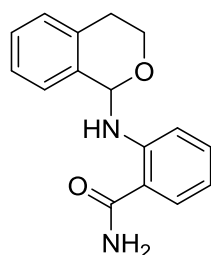Chemical Formula: C<sub>16</sub>H<sub>16</sub>N<sub>2</sub>O<sub>2</sub>

Exact Mass: 268.12

Elemental Analysis: C, 71.62; H, 6.01; N, 10.44; O, 11.93

2-(isochroman-1-ylamino)benzamide **3t**

<sup>1</sup>H NMR (500 MHz, CDCl<sub>3</sub>) δ 8.51 (d, *J* = 6.5 Hz, 1H), 7.41 (dd, *J* = 13.5, 4.7 Hz, 2H), 7.32 – 7.21 (m, 4H), 7.15 (d, *J* = 7.1 Hz, 1H), 6.82 – 6.71 (m, 1H), 6.08 (d, *J* = 6.8 Hz, 1H), 5.83 (s, 2H), 4.21 – 4.10 (m, 1H), 3.90 (ddd, *J* = 11.5, 5.6, 3.4 Hz, 1H), 2.99 (ddd, *J* = 15.9, 9.9, 5.6 Hz, 1H), 2.75 (dt, *J* = 16.5, 3.5 Hz, 1H). <sup>13</sup>C NMR (126 MHz, CDCl<sub>3</sub>) δ 171.92, 148.42, 135.16, 134.79, 133.63, 128.91, 128.13, 127.97, 126.86, 126.67, 116.84, 114.53, 114.34, 79.60, 77.40, 77.15, 76.89, 58.53, 28.39. Anal. Calcd for C<sub>16</sub>H<sub>16</sub>N<sub>2</sub>O<sub>2</sub>: C, 71.62; H, 6.01. Found: C, 71.95; H, 5.76. MS (ESI) *m/z*: 268.

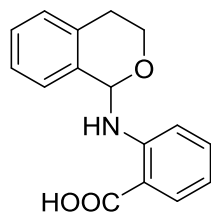

Chemical Formula: C<sub>16</sub>H<sub>15</sub>NO<sub>3</sub>  
 Exact Mass: 269.11  
 Elemental Analysis: C, 71.36; H, 5.61; N, 5.20; O, 17.82

*2-(isochroman-1-ylamino)benzoic acid 3x* <sup>1</sup>H NMR (500 MHz, DMSO) δ 12.89 (s, 1H), 8.58 (d, *J* = 7.1 Hz, 1H), 7.92 (d, *J* = 7.8 Hz, 1H), 7.44 (t, *J* = 7.6 Hz, 1H), 7.28 (d, *J* = 6.6 Hz, 1H), 7.23 (d, *J* = 8.5 Hz, 2H), 7.18 (d, *J* = 7.1 Hz, 1H), 6.75 (t, *J* = 7.5 Hz, 1H), 6.15 (d, *J* = 7.0 Hz, 1H). <sup>13</sup>C NMR (126 MHz, DMSO) δ 169.46, 148.62, 134.51, 134.11, 133.80, 130.98, 128.32, 127.35, 125.97, 125.83, 116.02, 113.12, 110.99, 77.84, 57.25, 27.10. Anal. Calcd for C<sub>16</sub>H<sub>15</sub>NO<sub>3</sub>: C, 71.36; H, 5.61. Found: C, 71.77; H, 5.41. MS (ESI) *m/z*: 269.

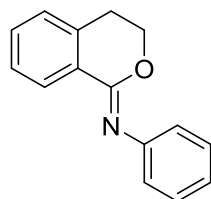

Chemical Formula: C<sub>15</sub>H<sub>13</sub>NO  
 Exact Mass: 223.10  
 Elemental Analysis: C, 80.69; H, 5.87; N, 6.27; O, 7.17

*(Z)-N-phenylisochroman-1-imine 4a* <sup>1</sup>H NMR (500 MHz, CDCl<sub>3</sub>) δ 8.30 (d, *J* = 7.8 Hz, 1H), 7.45 (td, *J* = 7.5, 1.1 Hz, 1H), 7.39 (t, *J* = 7.6 Hz, 1H), 7.35 (t, *J* = 7.8 Hz, 2H), 7.24 (d, *J* = 7.4 Hz, 1H), 7.13 (d, *J* = 7.4 Hz, 2H), 7.09 (t, *J* = 7.4 Hz, 1H), 4.36 (t, *J* = 5.8 Hz, 2H), 3.03 (t, *J* = 5.7 Hz, 2H). <sup>13</sup>C NMR (126 MHz, CDCl<sub>3</sub>) δ 151.65, 146.28, 140.18, 136.01, 130.17, 127.64, 127.54, 126.37, 122.42, 121.63, 65.51, 27.54. Anal. Calcd for C<sub>16</sub>H<sub>16</sub>N<sub>2</sub>O<sub>2</sub>: C, 80.69; H, 5.87. Found: C, 80.49; H, 5.61. MS (ESI) *m/z*: 223.

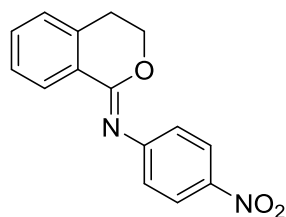

Chemical Formula: C<sub>15</sub>H<sub>12</sub>N<sub>2</sub>O<sub>3</sub>  
 Exact Mass: 268.08  
 Elemental Analysis: C, 67.16; H, 4.51; N, 10.44; O, 17.89

*(Z)-N-(4-nitrophenyl)isochroman-1-imine 4b* <sup>1</sup>H NMR (500 MHz, CDCl<sub>3</sub>) δ 8.25 (d, *J* = 7.8 Hz, 1H), 8.21 (d, *J* = 8.9 Hz, 2H), 7.50 (t, *J* = 7.5 Hz, 1H), 7.41 (t, *J* = 7.6 Hz, 1H), 7.25 (s, 1H), 7.16 (d, *J* = 8.9 Hz, 2H), 4.38 (t, *J* = 5.8 Hz, 2H), 3.06 (t, *J* = 5.8 Hz, 2H). <sup>13</sup>C NMR (126 MHz, CDCl<sub>3</sub>) δ 153.37, 152.95, 142.60, 136.27, 130.93, 127.86, 126.57, 126.13, 123.50, 121.97, 65.95, 27.30. Anal. Calcd for C<sub>16</sub>H<sub>16</sub>N<sub>2</sub>O<sub>2</sub>: C, 67.16; H, 4.51. Found: C, 66.88; H, 4.66. MS (ESI) *m/z*: 268.

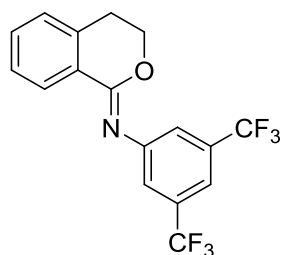

Chemical Formula: C<sub>17</sub>H<sub>11</sub>F<sub>6</sub>NO

Exact Mass: 359.07

Elemental Analysis: C, 56.83; H, 3.09; F, 31.73; N, 3.90; O, 4.45

*(Z)*-N-(3,5-bis(trifluoromethyl)phenyl)isochroman-1-imine **4c**

<sup>1</sup>H NMR (500 MHz, CDCl<sub>3</sub>) δ 8.25 (d, *J* = 7.8 Hz, 1H), 7.55 (d, *J* = 3.8 Hz, 3H), 7.49 (t, *J* = 7.4 Hz, 1H), 7.40 (t, *J* = 7.6 Hz, 1H), 7.25 (s, 1H), 4.39 (t, *J* = 5.8 Hz, 2H), 3.06 (t, *J* = 5.8 Hz, 2H). <sup>13</sup>C NMR (126 MHz, CDCl<sub>3</sub>) δ 154.65, 148.90, 137.25, 132.07, 131.92, 131.66, 128.87, 127.67, 127.22, 124.71, 123.36, 122.54, 116.87, 67.03, 28.38. <sup>19</sup>F NMR (470 MHz, CDCl<sub>3</sub>) δ -62.82. Anal. Calcd for C<sub>17</sub>H<sub>11</sub>F<sub>6</sub>NO: C, 56.83; H, 3.09. Found: C, 57.04; H, 3.22. MS (ESI) *m/z*: 359.

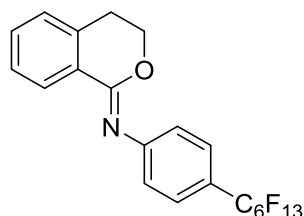

Chemical Formula: C<sub>21</sub>H<sub>12</sub>F<sub>13</sub>NO

Exact Mass: 541.07

Elemental Analysis: C, 46.60; H, 2.23; F, 45.63; N, 2.59; O, 2.96

*(Z)*-N-(4-(6,6,6,6,6,6,6,6,6,6,6,6,6,6-tridecafluoro-6H-hexa-1,3,5-triyn-1-yl)phenyl)isochroman-1-imine **4e**

<sup>1</sup>H NMR (500 MHz, CDCl<sub>3</sub>) δ 8.22 (d, *J* = 7.8 Hz, 1H), 7.48 (d, *J* = 8.3 Hz, 2H), 7.42 (t, *J* = 7.3 Hz, 1H), 7.34 (t, *J* = 7.6 Hz, 1H), 7.20 (d, *J* = 7.6 Hz, 1H), 7.14 (d, *J* = 8.3 Hz, 2H), 4.32 (s, 2H), 3.00 (s, 2H). <sup>13</sup>C NMR (126 MHz, CDCl<sub>3</sub>) δ 153.56, 151.15, 137.20, 131.73, 128.85, 127.57, 127.40, 123.40, 122.80, 116.38, 66.83, 28.48. <sup>19</sup>F NMR (470 MHz, CDCl<sub>3</sub>) δ -80.72, -80.74, -80.76, -109.91, -109.94, -109.97, -121.24, -121.79, -121.88, -122.69, -126.09. Anal. Calcd for C<sub>16</sub>H<sub>16</sub>N<sub>2</sub>O<sub>2</sub>: C, 46.60; H, 2.23. Found: C, 46.93; H, 2.00. MS (ESI) *m/z*: 541.



## 4 NMR Spectra of All Products

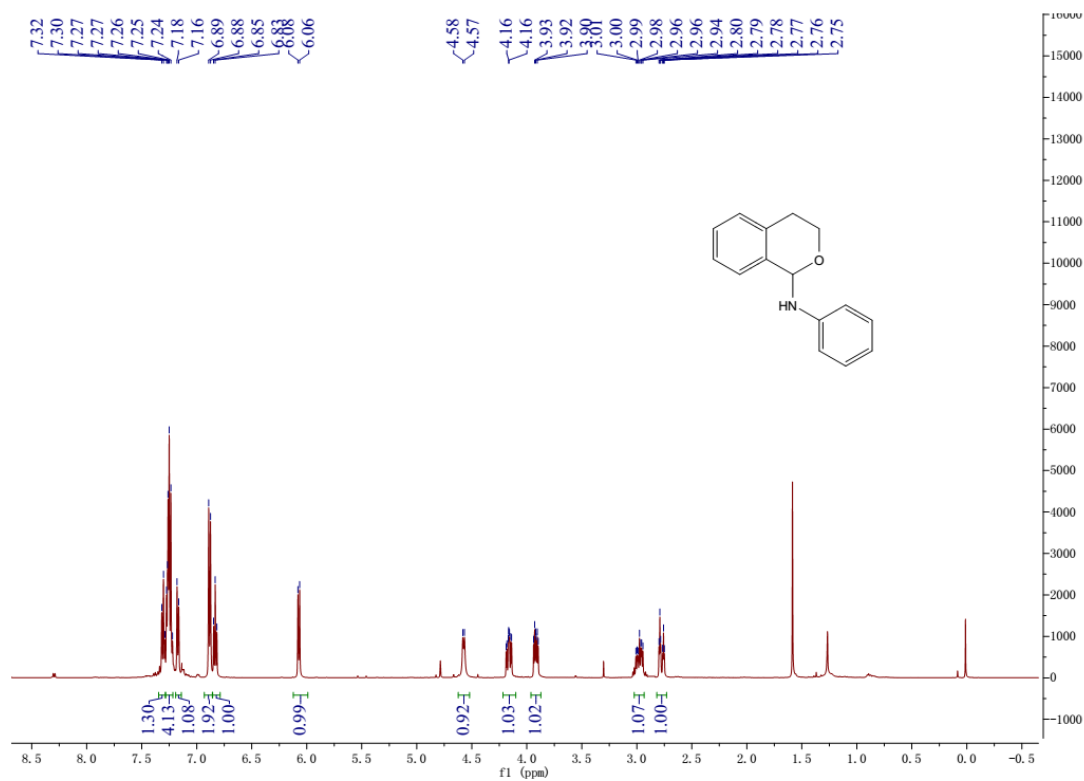

**<sup>1</sup>H NMR spectrum (500 MHz, CDCl<sub>3</sub>) of **3a****

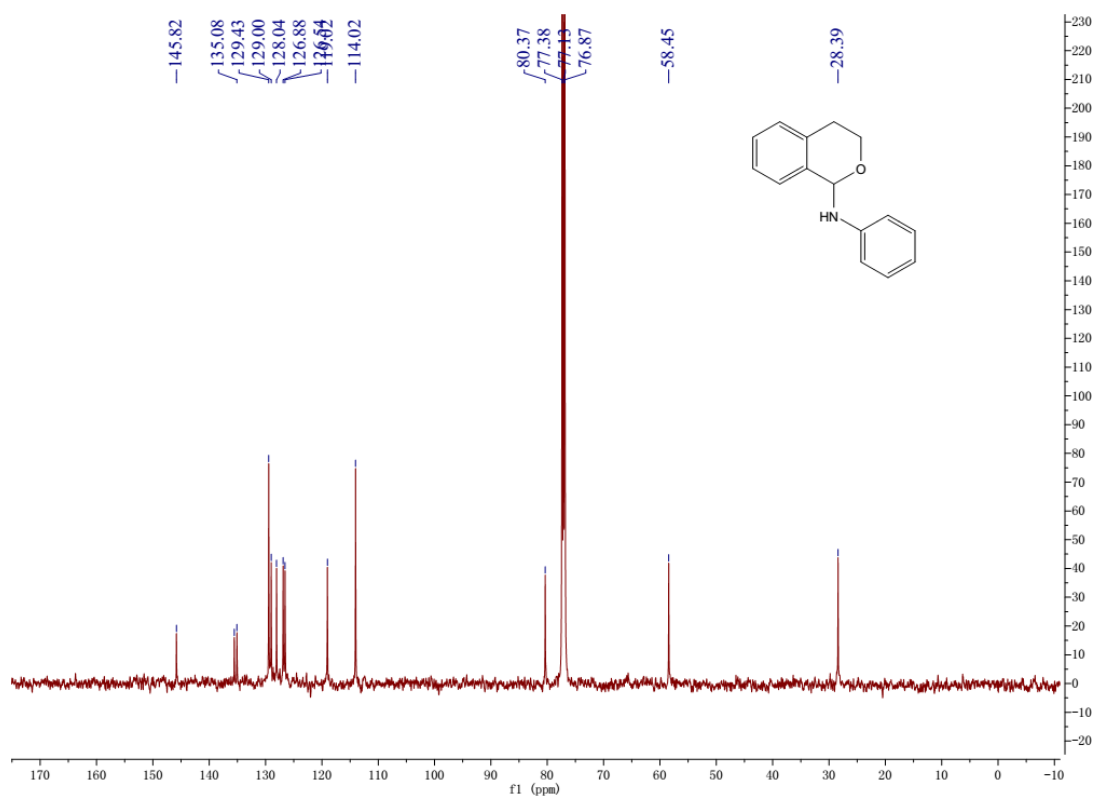

**<sup>13</sup>C NMR spectrum (125 MHz, CDCl<sub>3</sub>) of **3a****

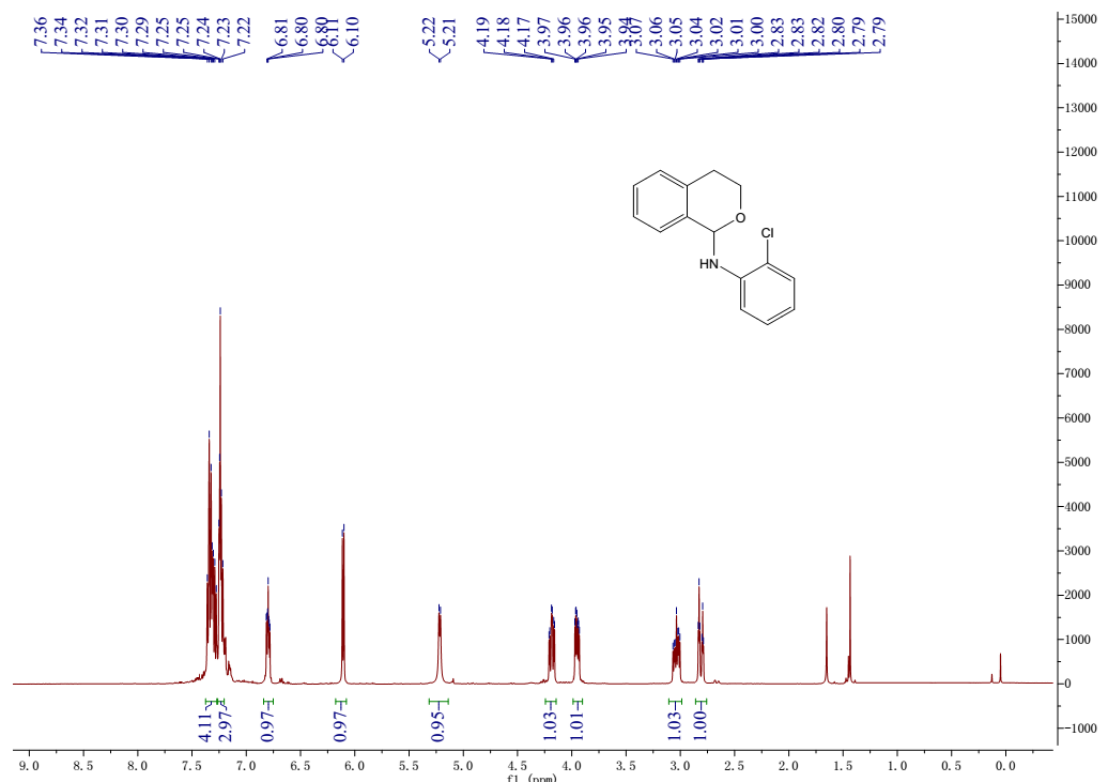

<sup>1</sup>H NMR spectrum (500 MHz, CDCl<sub>3</sub>) of **3b**

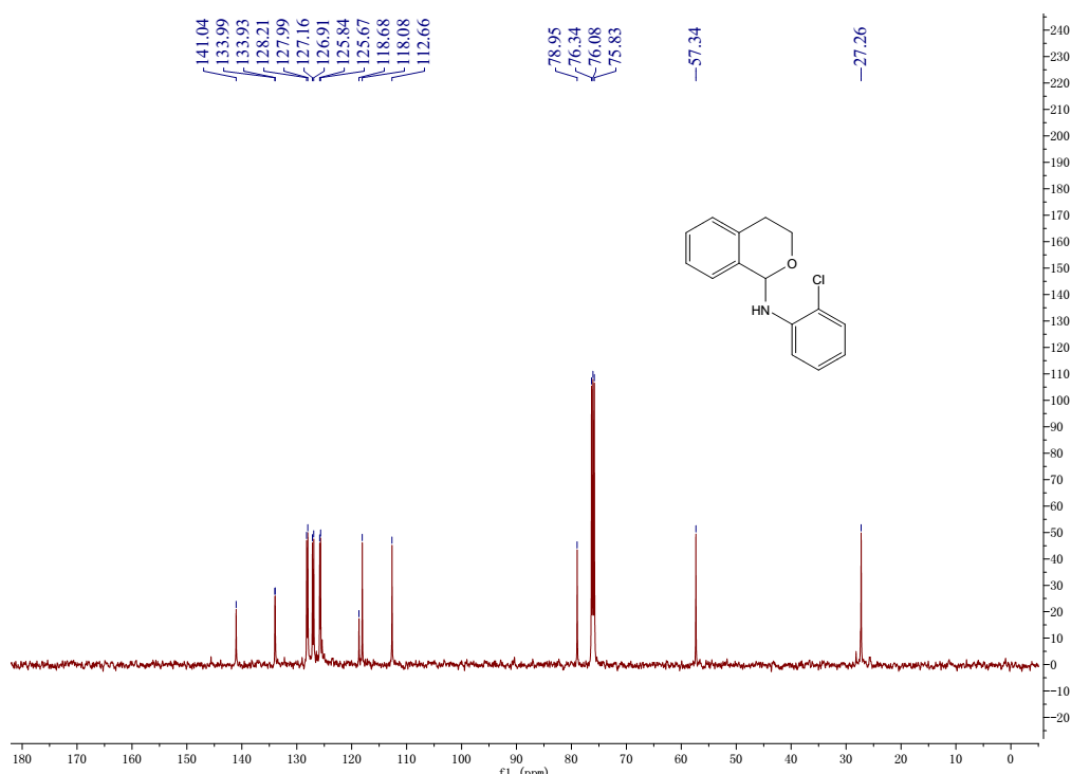

<sup>13</sup>C NMR spectrum (125 MHz, CDCl<sub>3</sub>) of **3b**

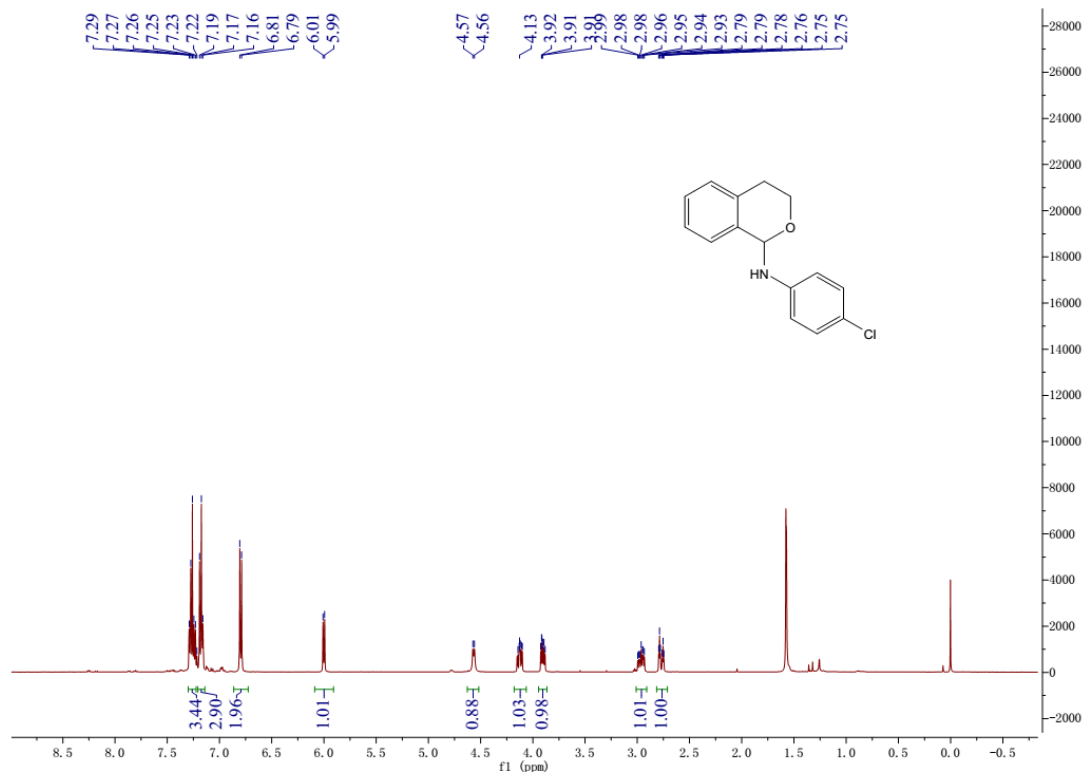

<sup>1</sup>H NMR spectrum (500 MHz, CDCl<sub>3</sub>) of **3c**

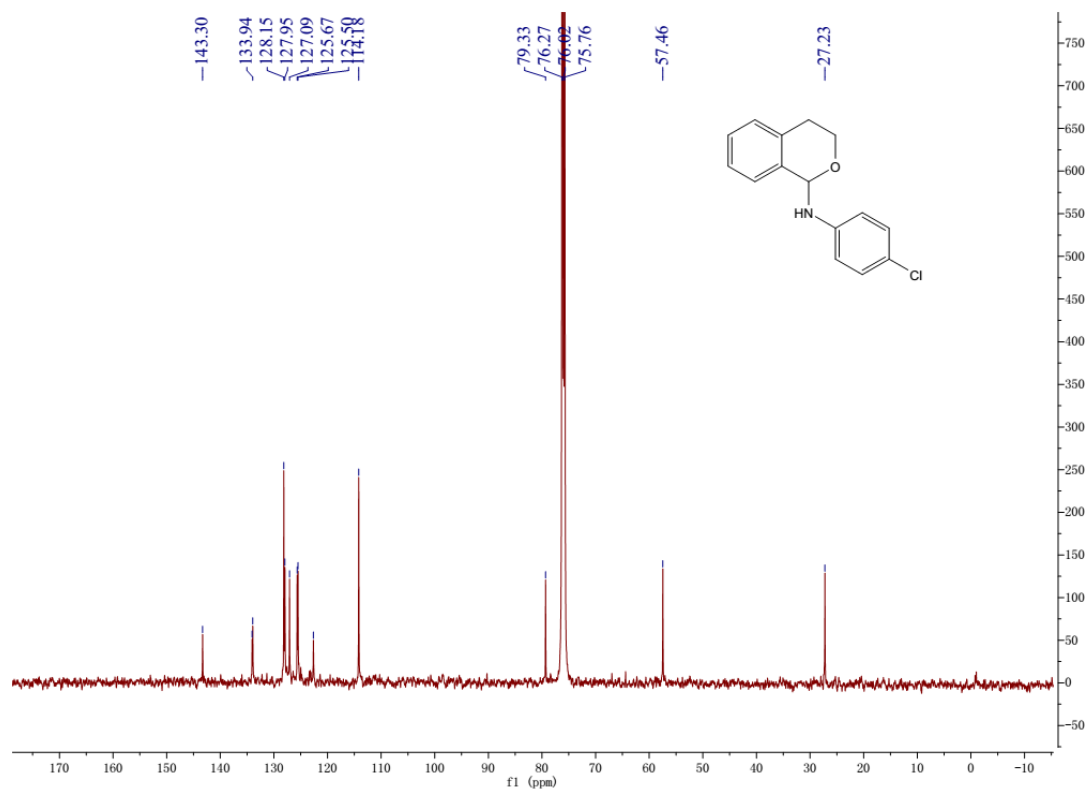

<sup>13</sup>C NMR spectrum (125 MHz, CDCl<sub>3</sub>) of **3c**

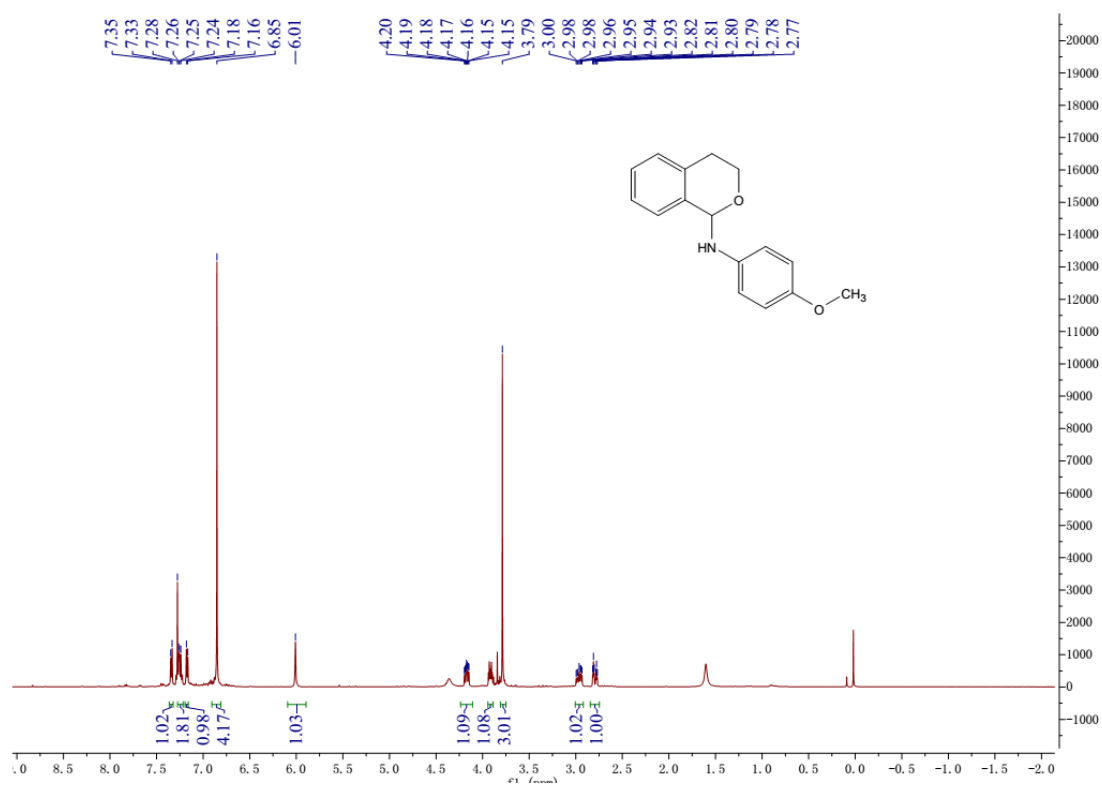

<sup>1</sup>H NMR spectrum (500 MHz, CDCl<sub>3</sub>) of **3d**

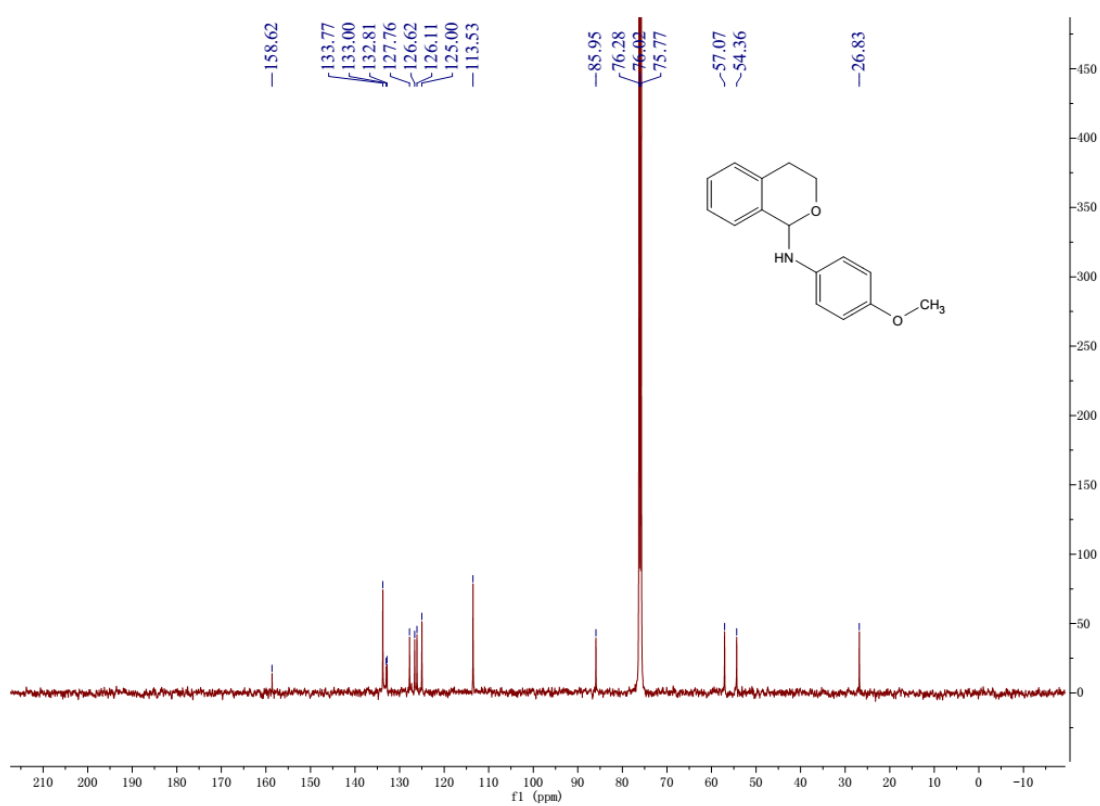

<sup>13</sup>C NMR spectrum (125 MHz, CDCl<sub>3</sub>) of **3d**

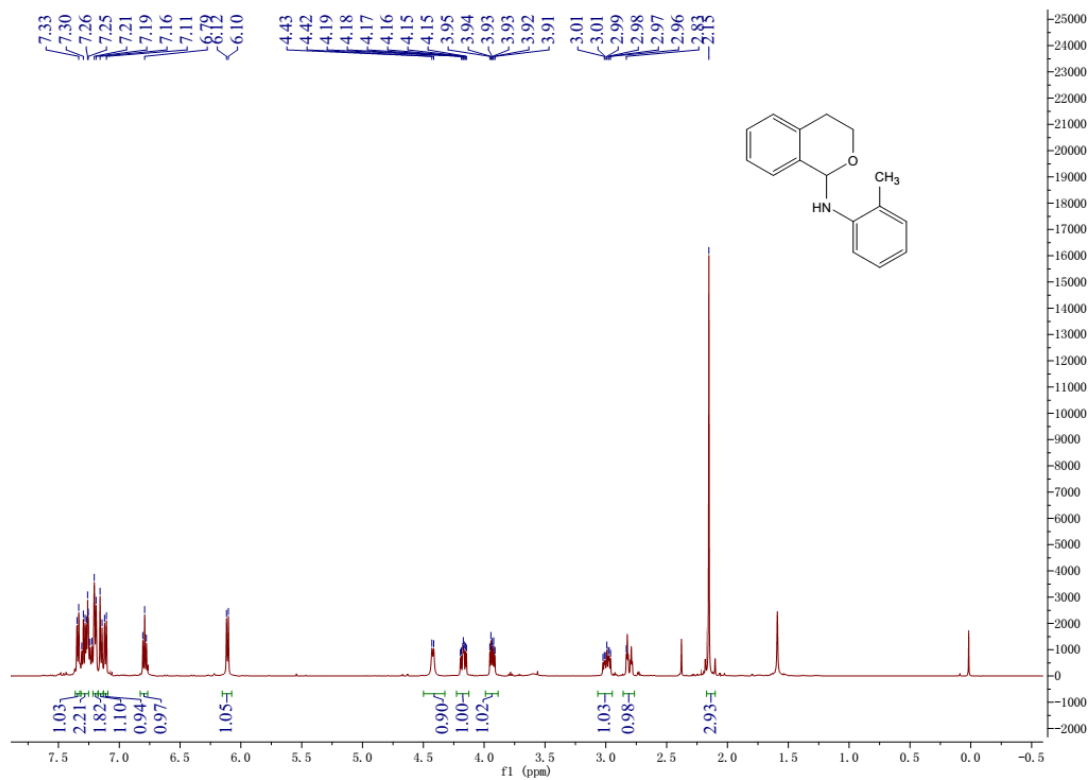

<sup>1</sup>H NMR spectrum (500 MHz, CDCl<sub>3</sub>) of **3e**

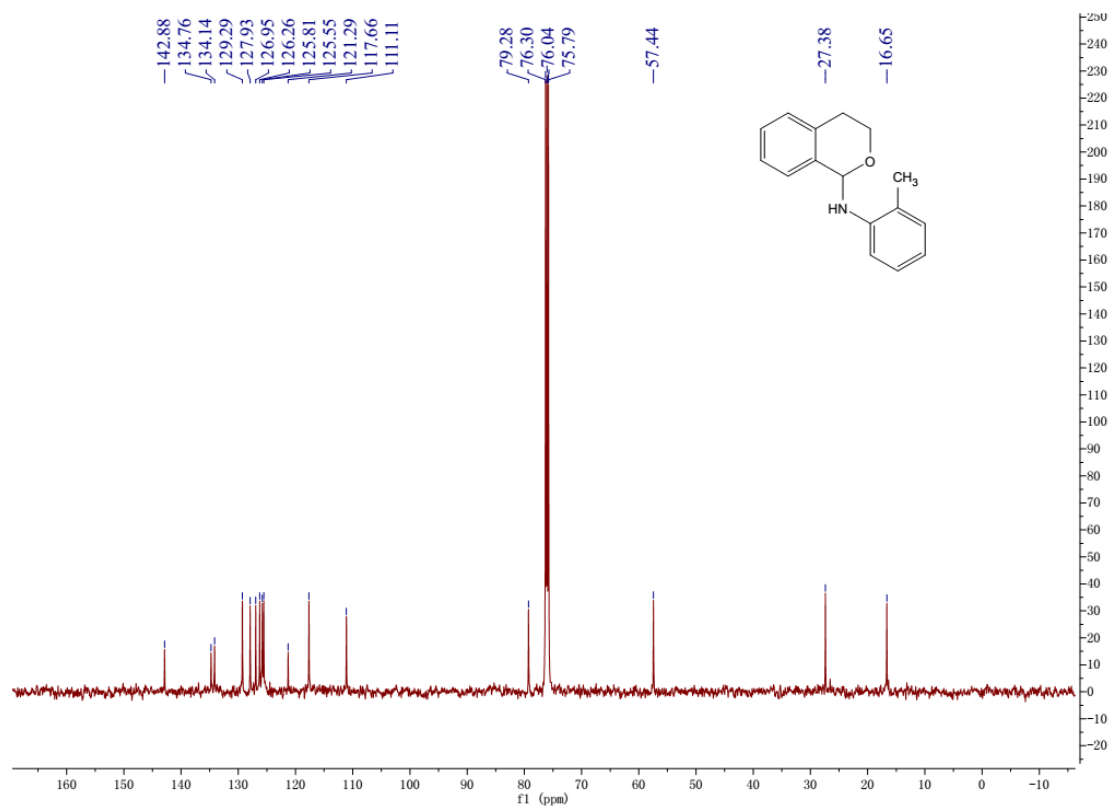

<sup>13</sup>C NMR spectrum (500 MHz, CDCl<sub>3</sub>) of **3e**

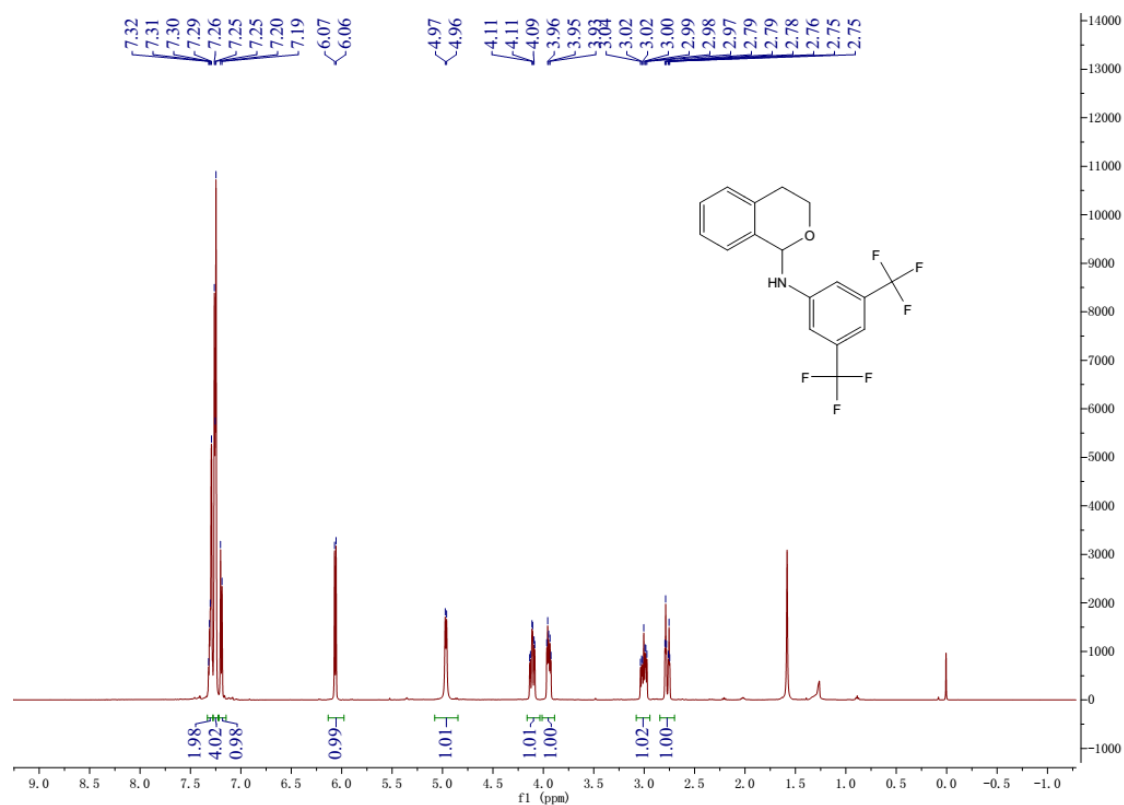

<sup>1</sup>H NMR spectrum (500 MHz, CDCl<sub>3</sub>) of **3f**

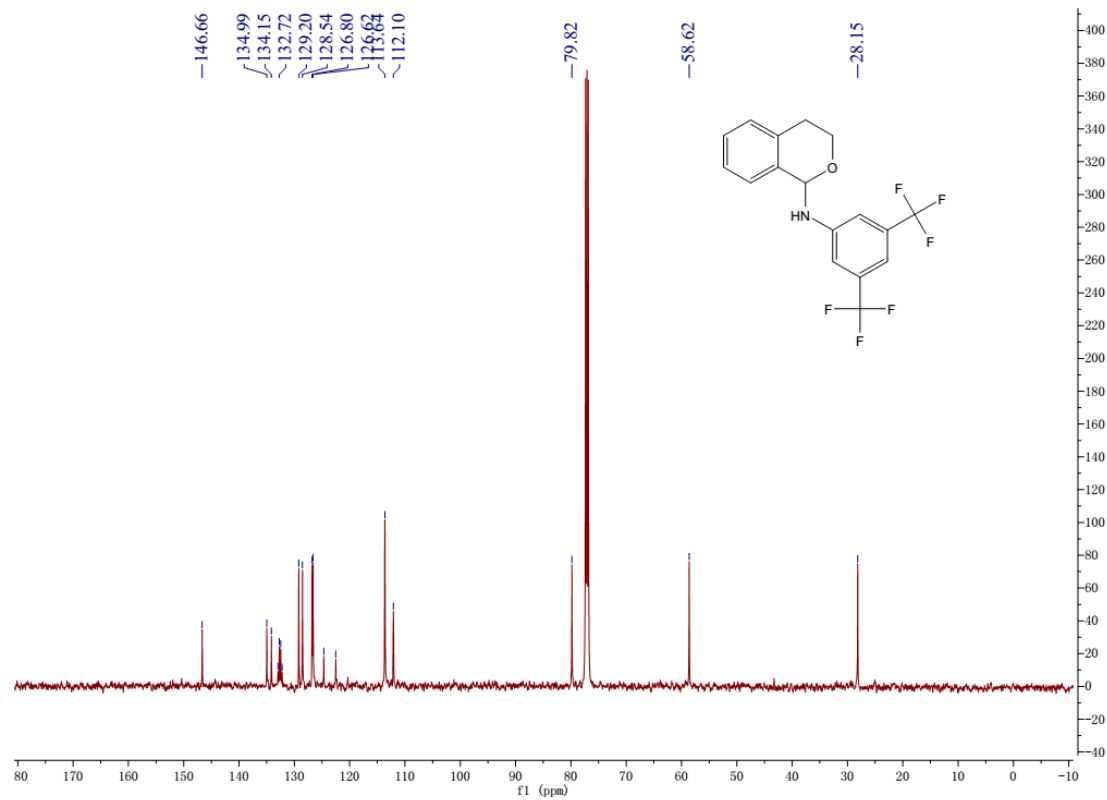

<sup>13</sup>C NMR spectrum (500 MHz, CDCl<sub>3</sub>) of **3f**

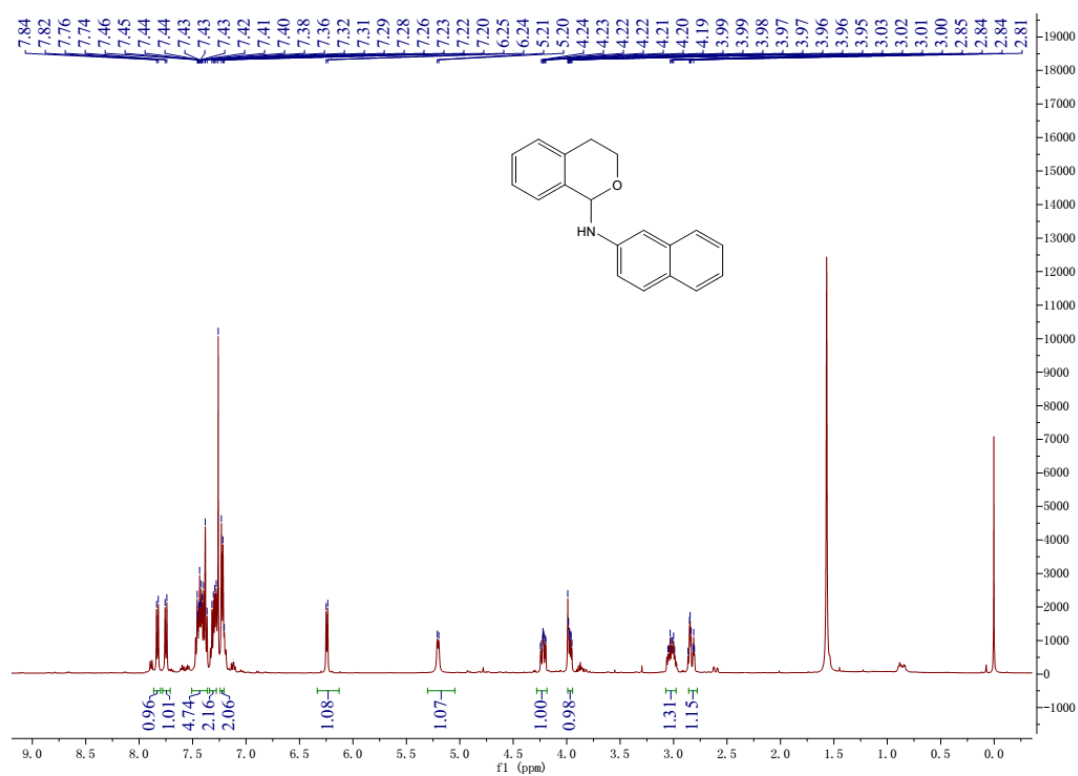

<sup>1</sup>H NMR spectrum (500 MHz, CDCl<sub>3</sub>) of **3g**

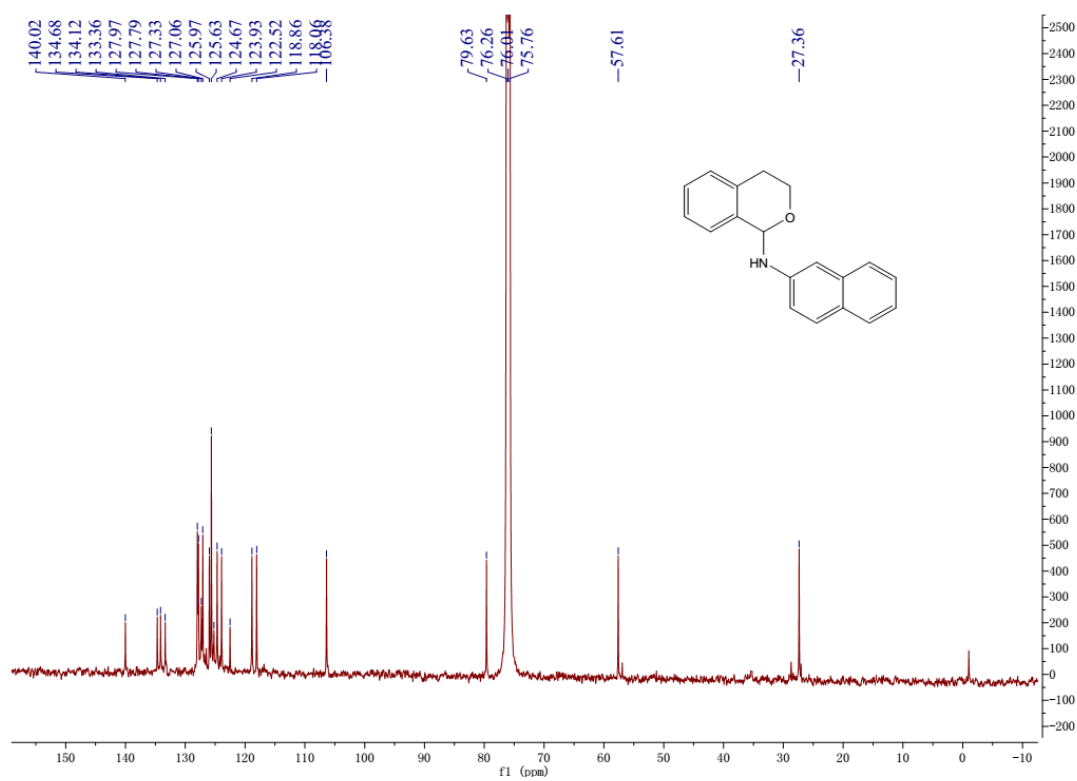

<sup>13</sup>C NMR spectrum (125 MHz, CDCl<sub>3</sub>) of **3g**

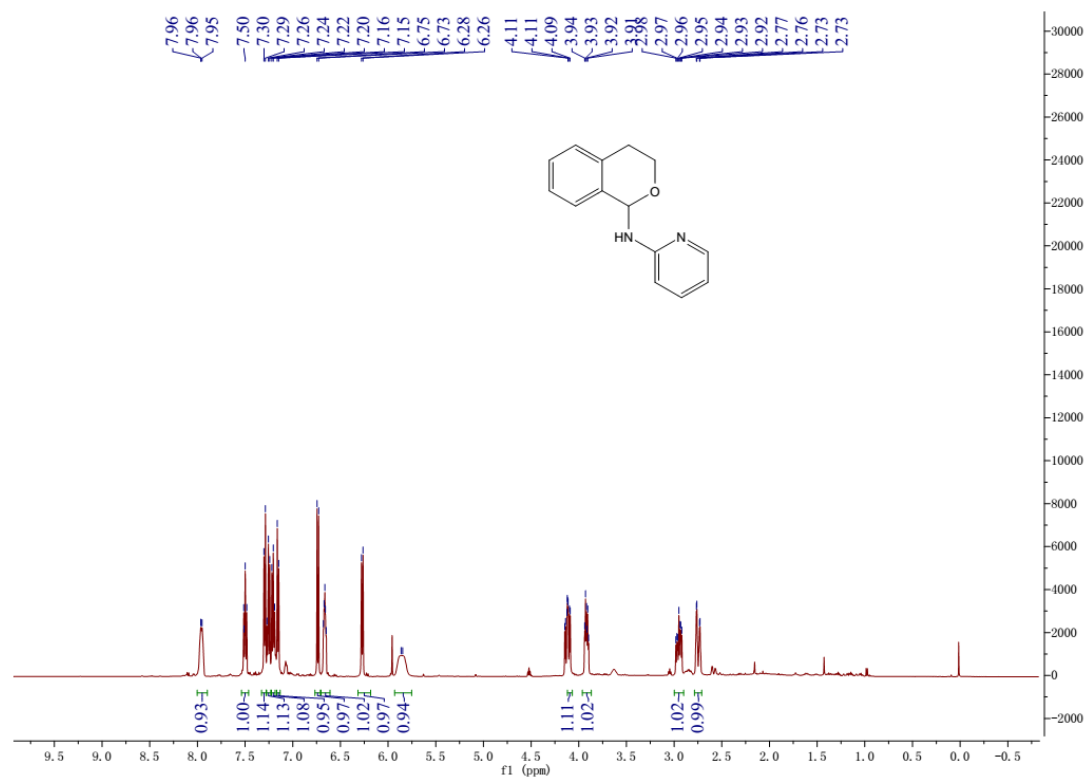

<sup>1</sup>H NMR spectrum (500 MHz, CDCl<sub>3</sub>) of **3h**

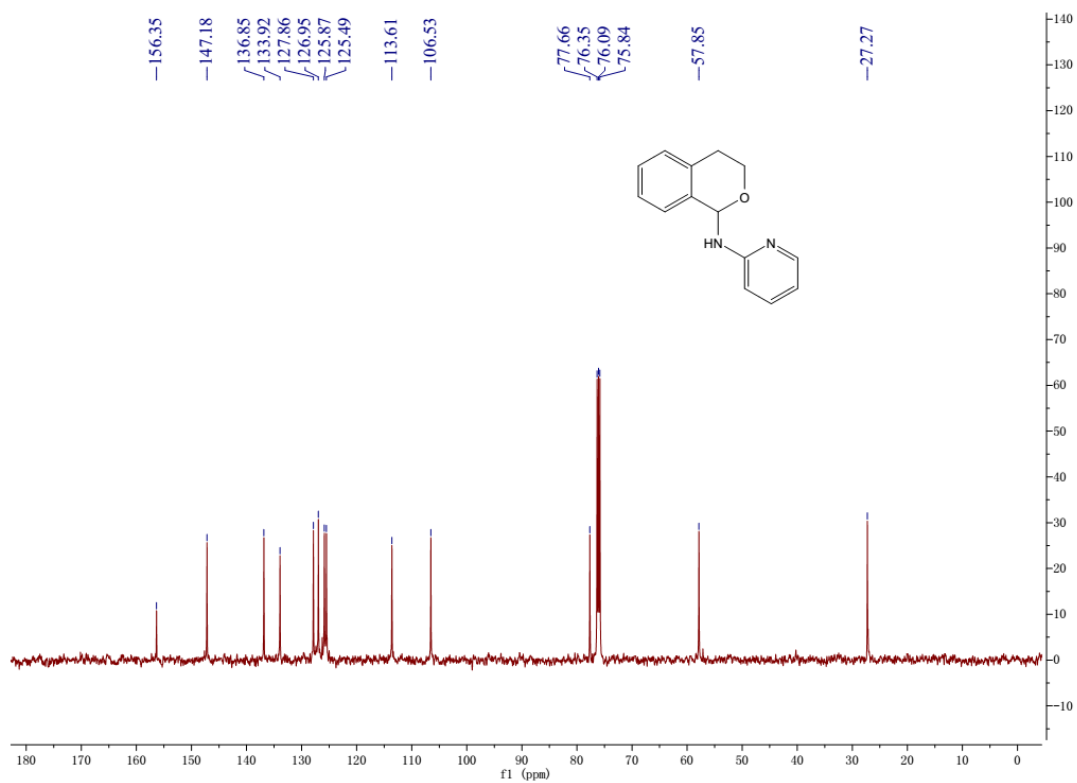

<sup>13</sup>C NMR spectrum (125 MHz, CDCl<sub>3</sub>) of **3h**



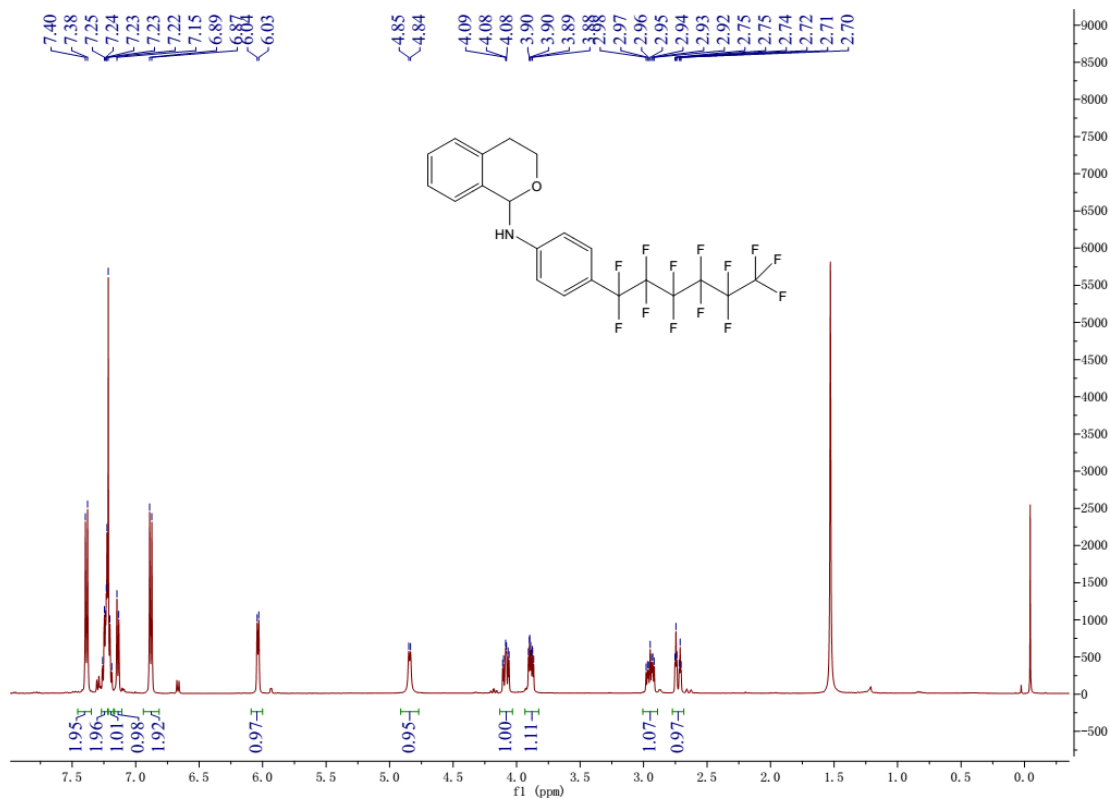

<sup>1</sup>H NMR spectrum (500 MHz, CDCl<sub>3</sub>) of **31**

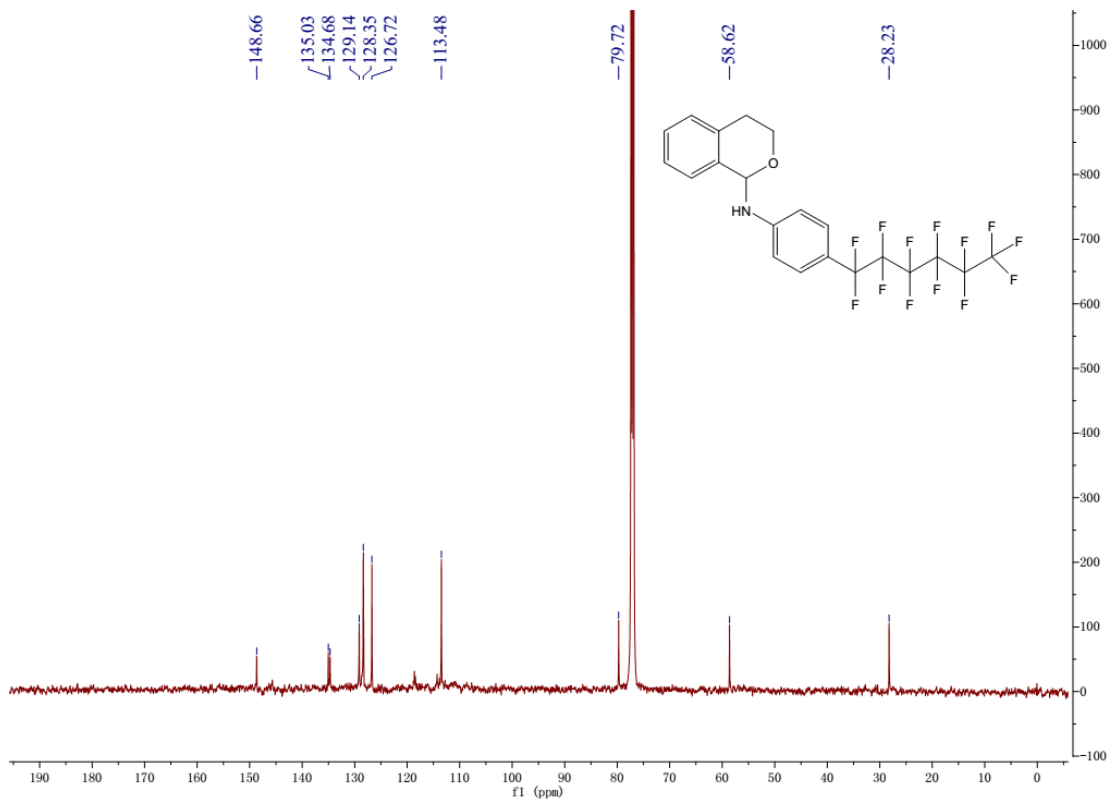

<sup>13</sup>C NMR spectrum (125 MHz, CDCl<sub>3</sub>) of **31**

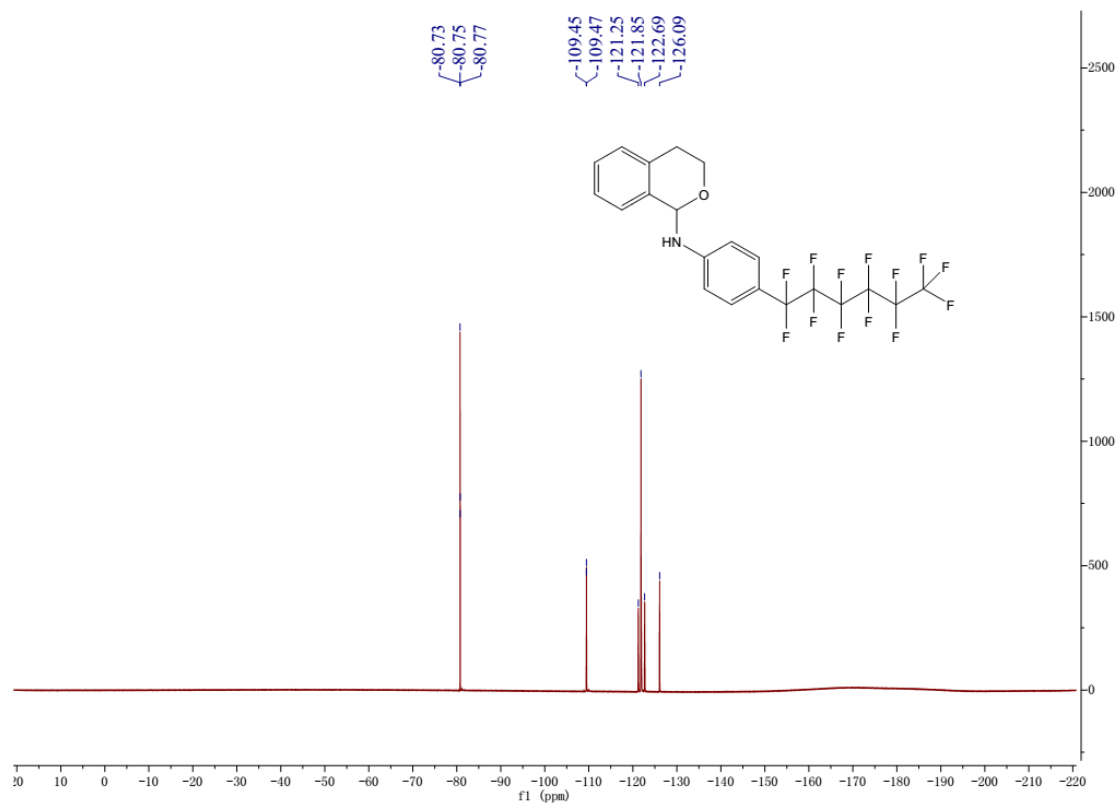

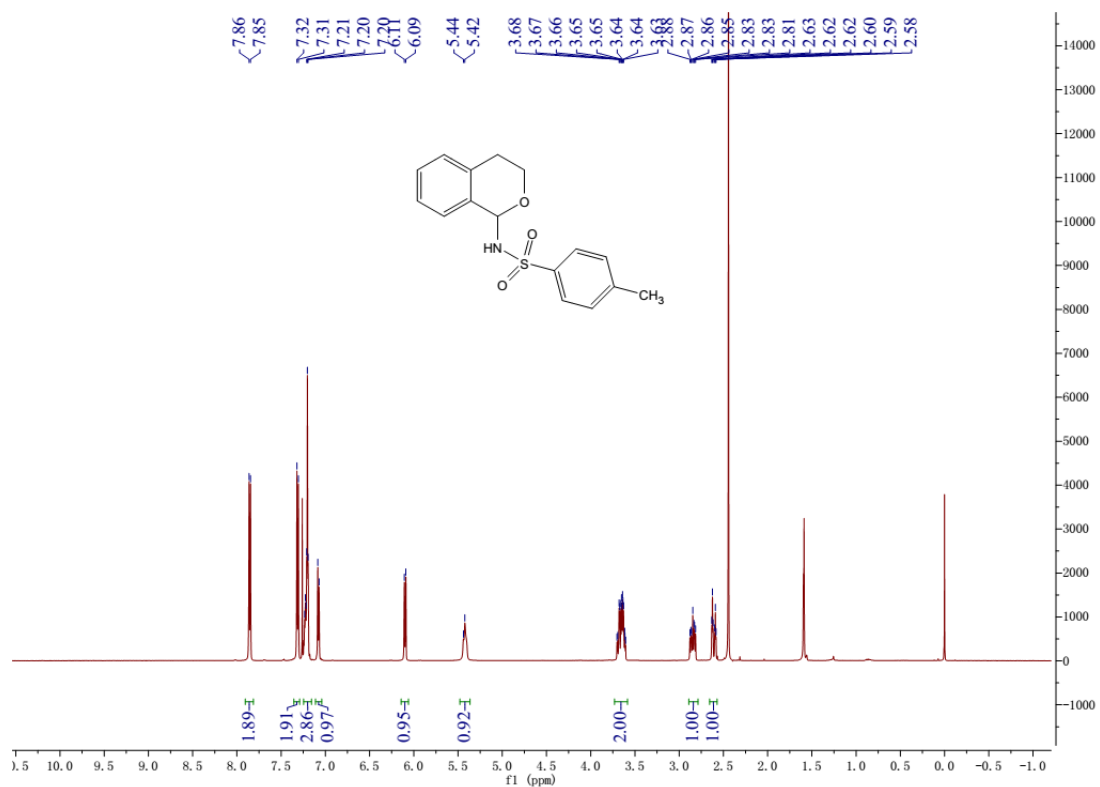

<sup>1</sup>H NMR spectrum (500 MHz, CDCl<sub>3</sub>) of **3n**

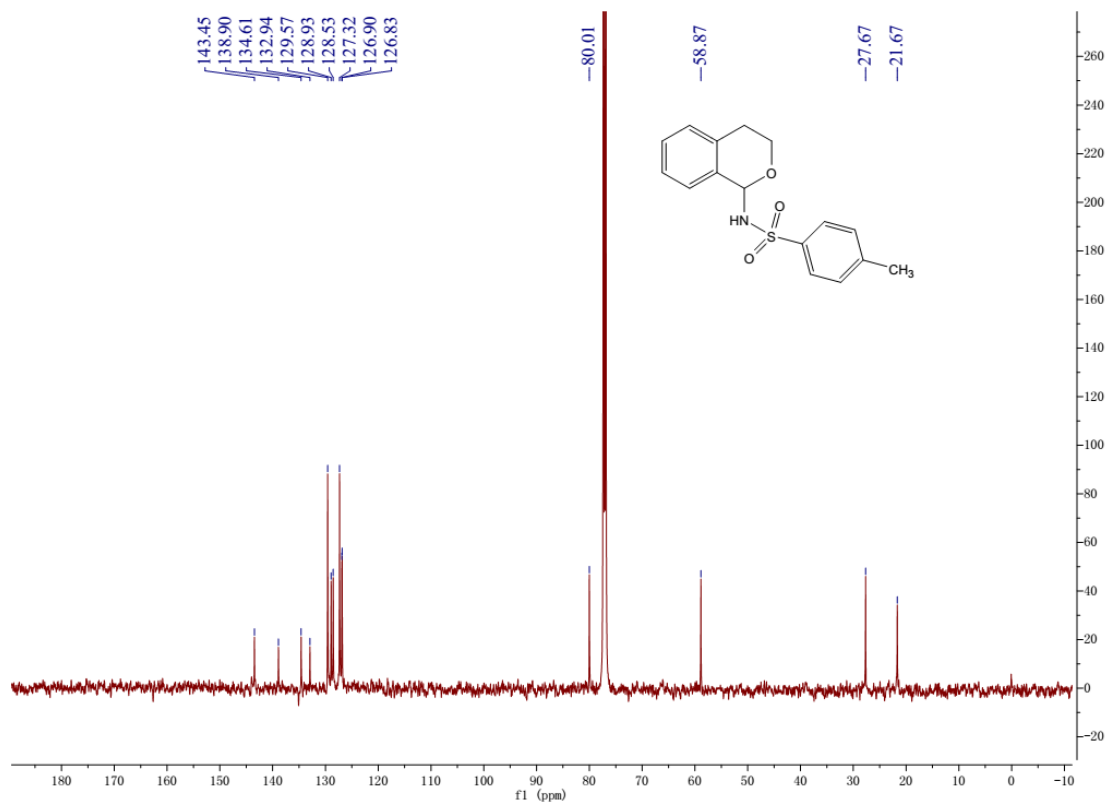

<sup>13</sup>C NMR spectrum (125 MHz, CDCl<sub>3</sub>) of **3n**

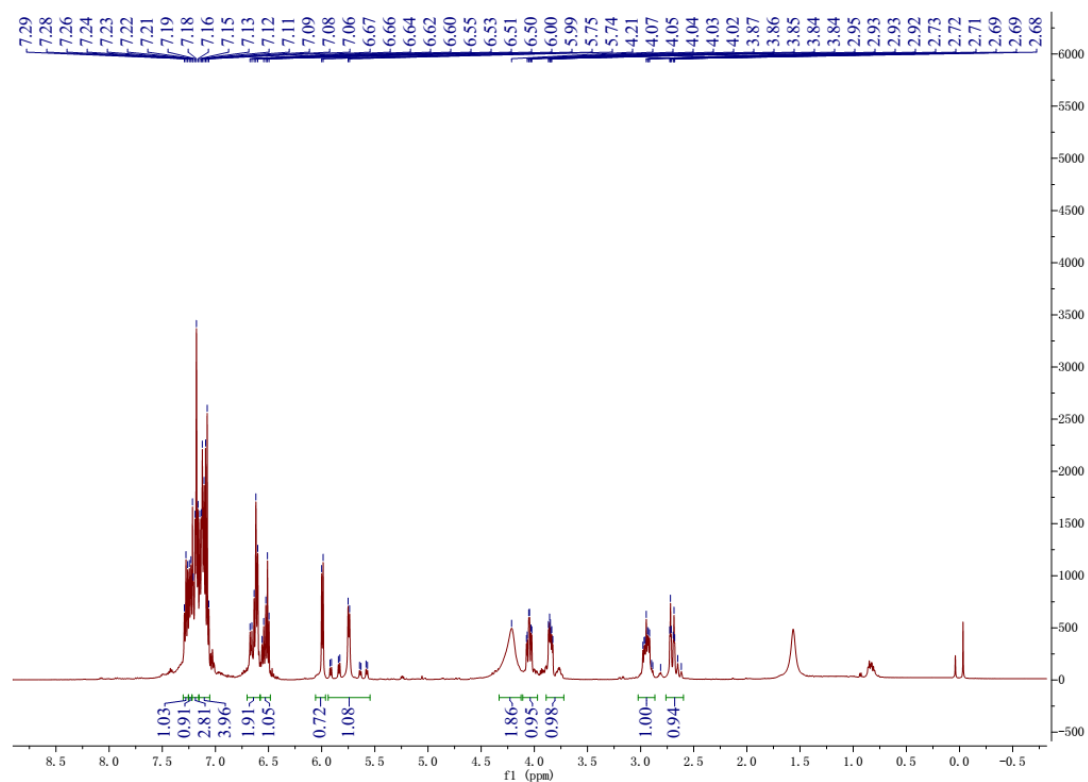Mixture of **3u** and **3v**

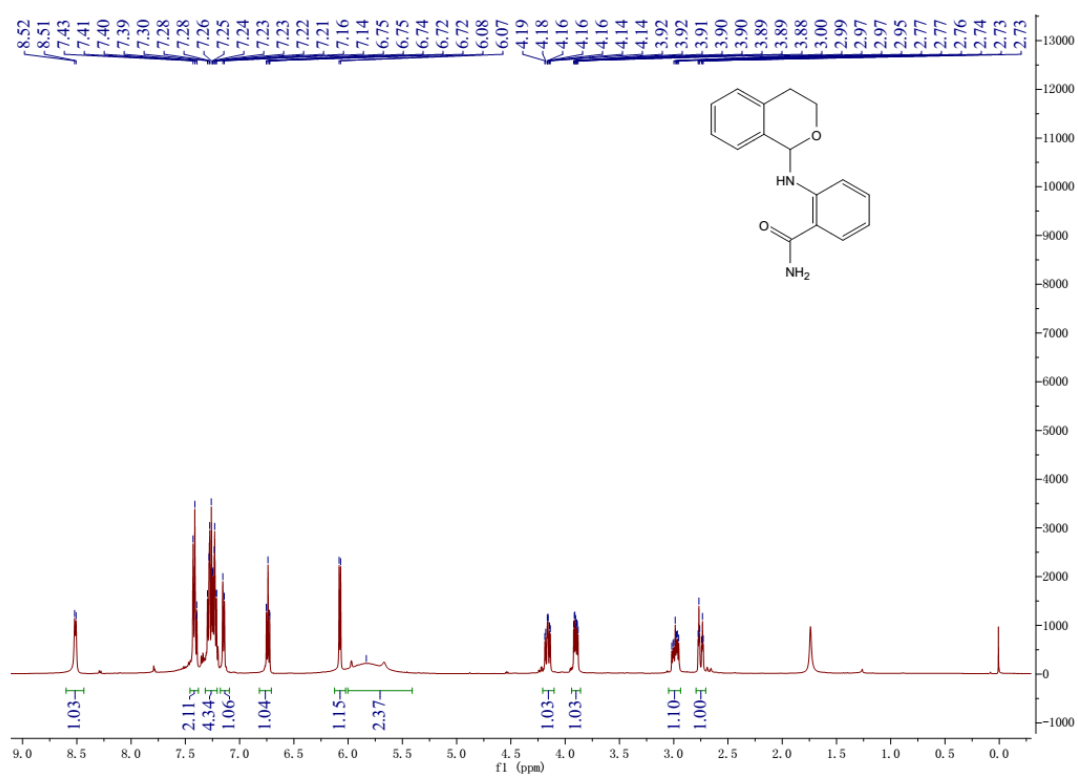

<sup>1</sup>H NMR spectrum (500 MHz, CDCl<sub>3</sub>) of **3t**

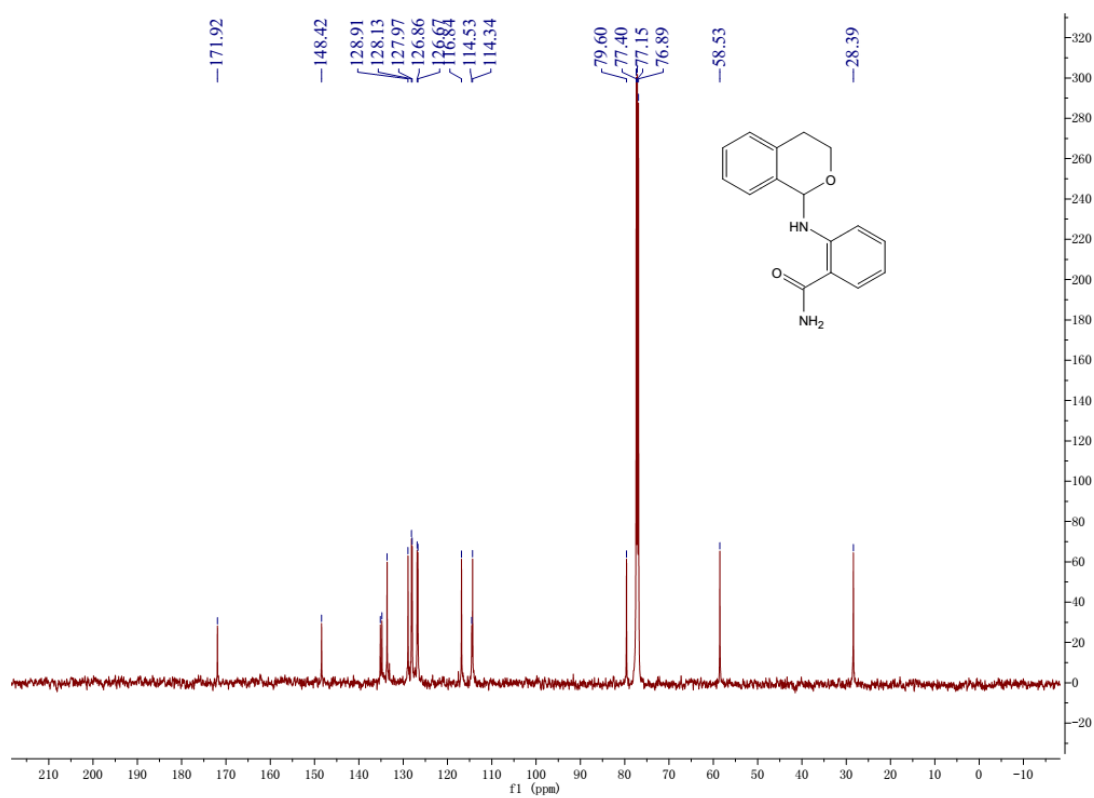

<sup>13</sup>C NMR spectrum (125 MHz, CDCl<sub>3</sub>) of **3t**

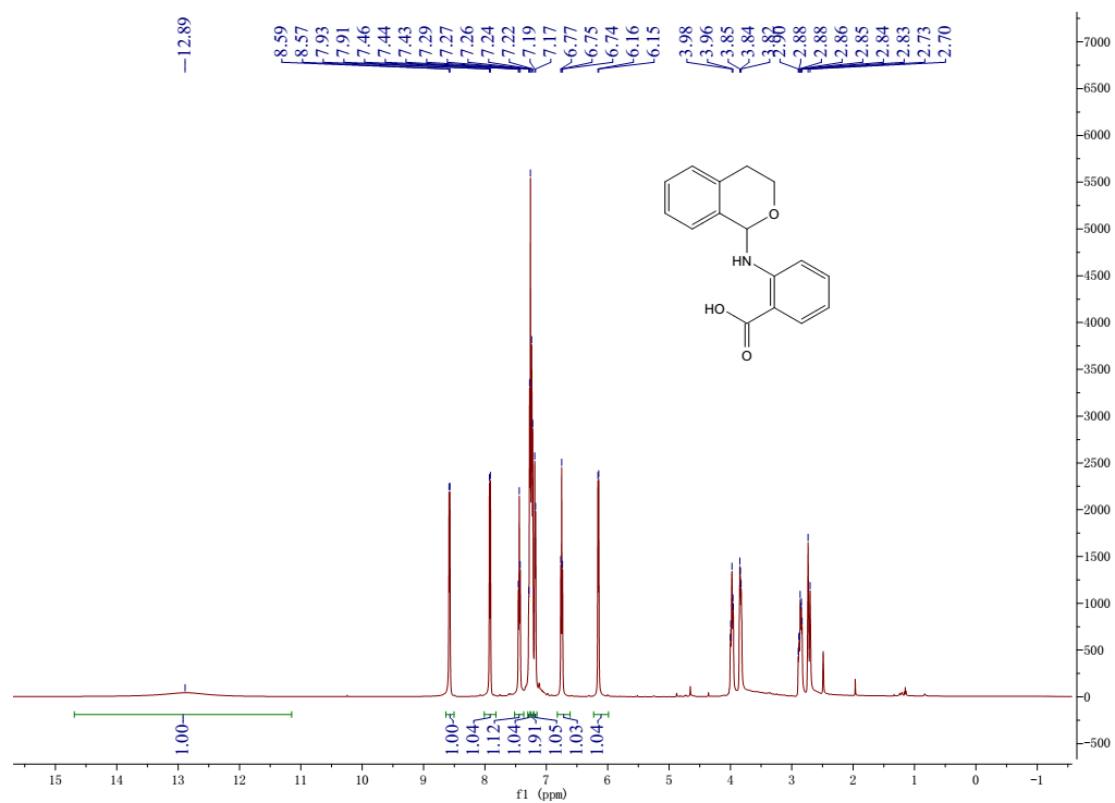

<sup>1</sup>H NMR spectrum (500 MHz, CDCl<sub>3</sub>) of **3x**

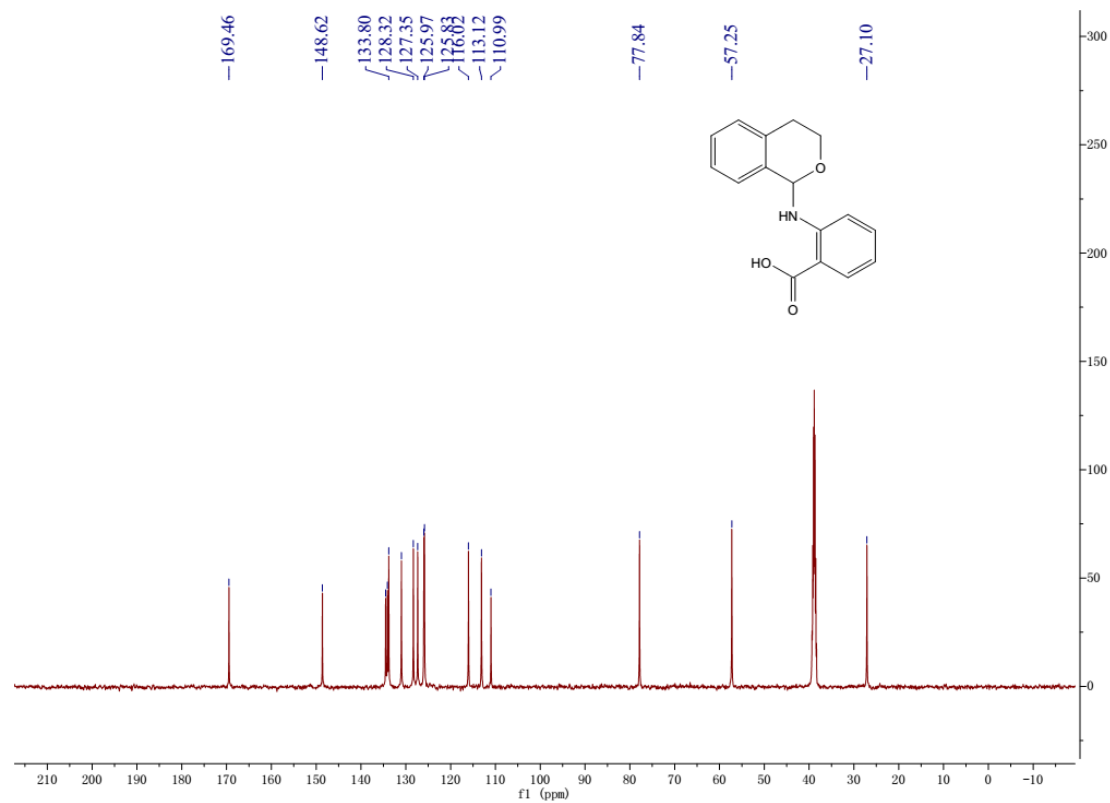

<sup>13</sup>C NMR spectrum (125 MHz, CDCl<sub>3</sub>) of **3x**

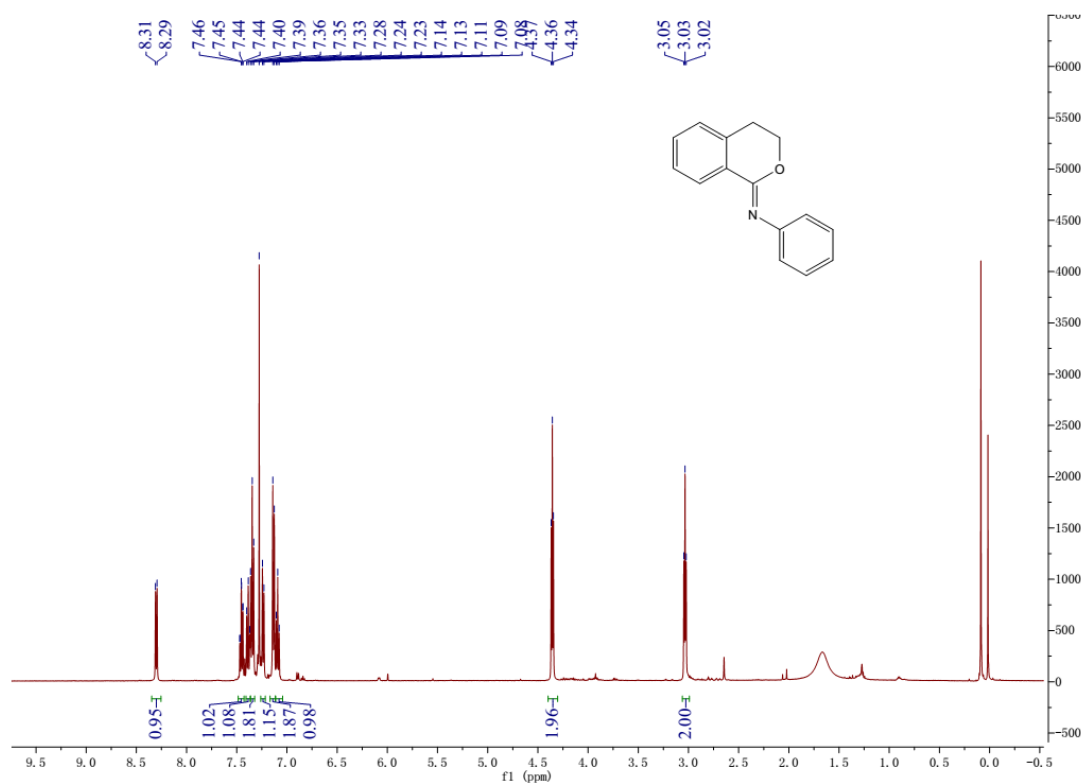

<sup>1</sup>H NMR spectrum (500 MHz, CDCl<sub>3</sub>) of **4a**

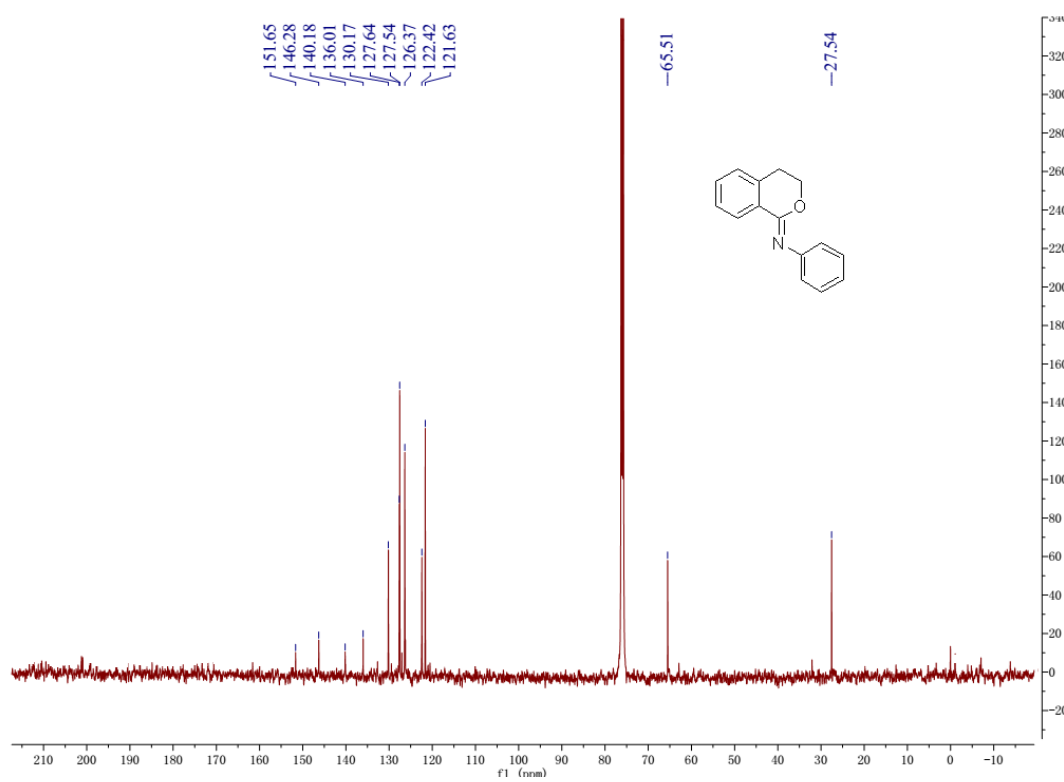

<sup>13</sup>C NMR spectrum (125 MHz, CDCl<sub>3</sub>) of **4a**

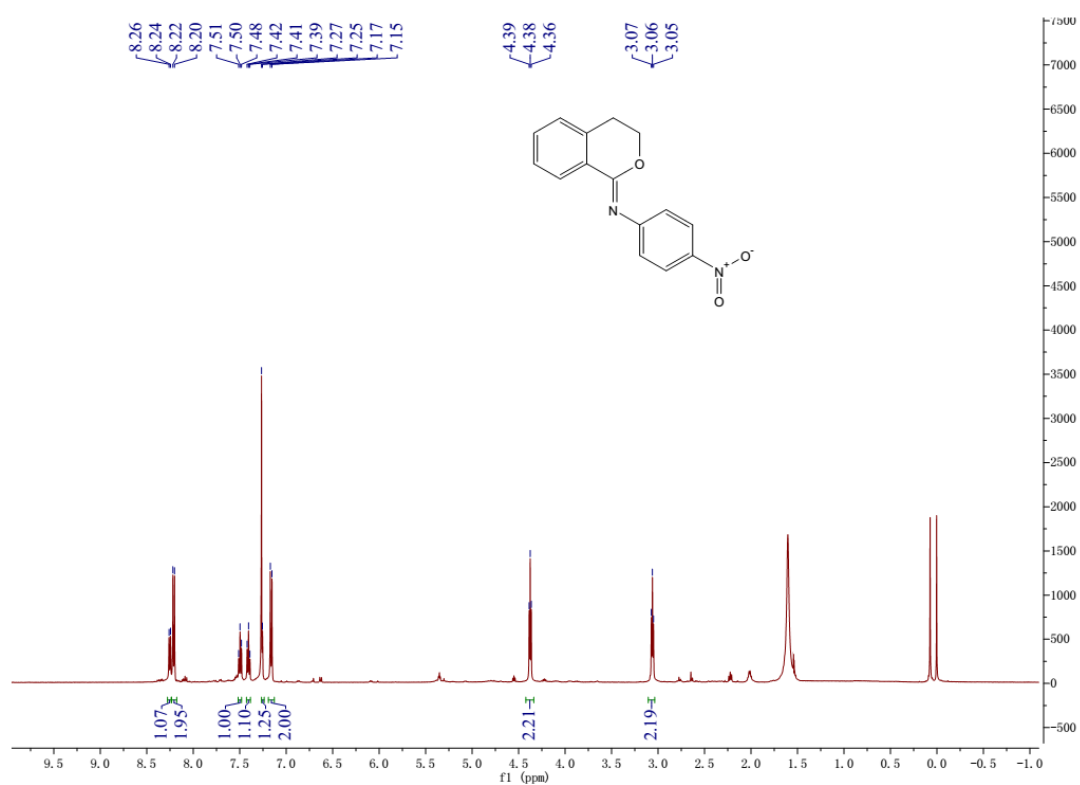

<sup>1</sup>H NMR spectrum (500 MHz, CDCl<sub>3</sub>) of **4b**

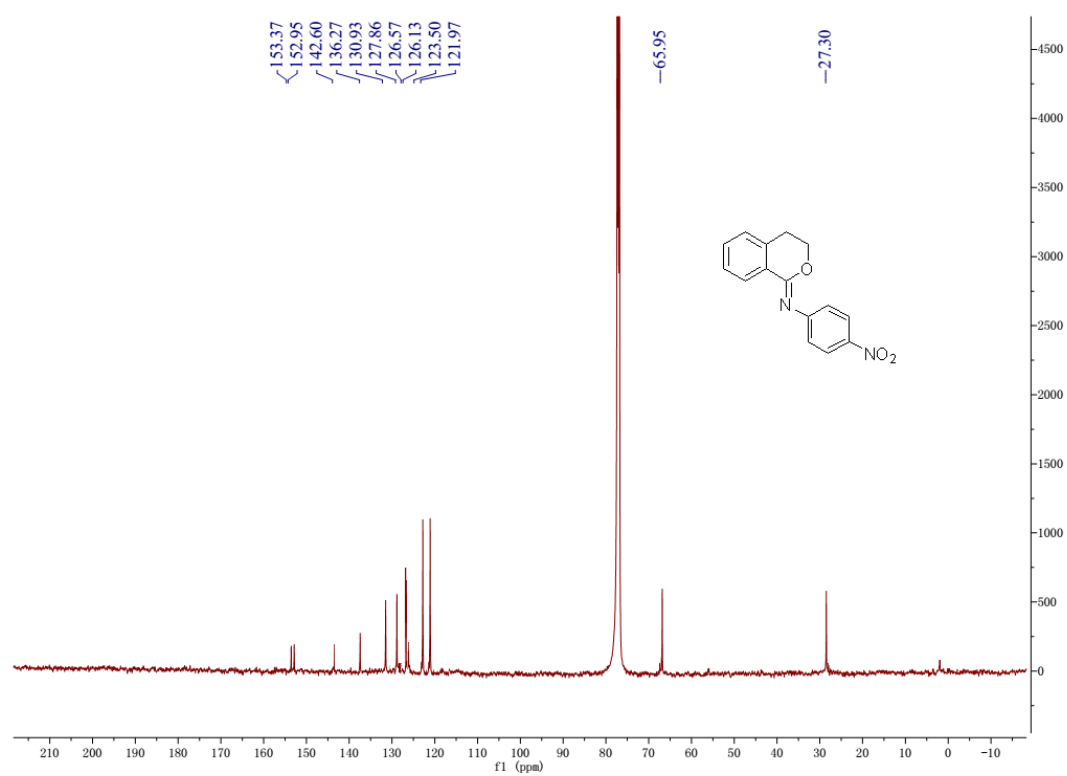

<sup>13</sup>C NMR spectrum (500 MHz, CDCl<sub>3</sub>) of **4b**



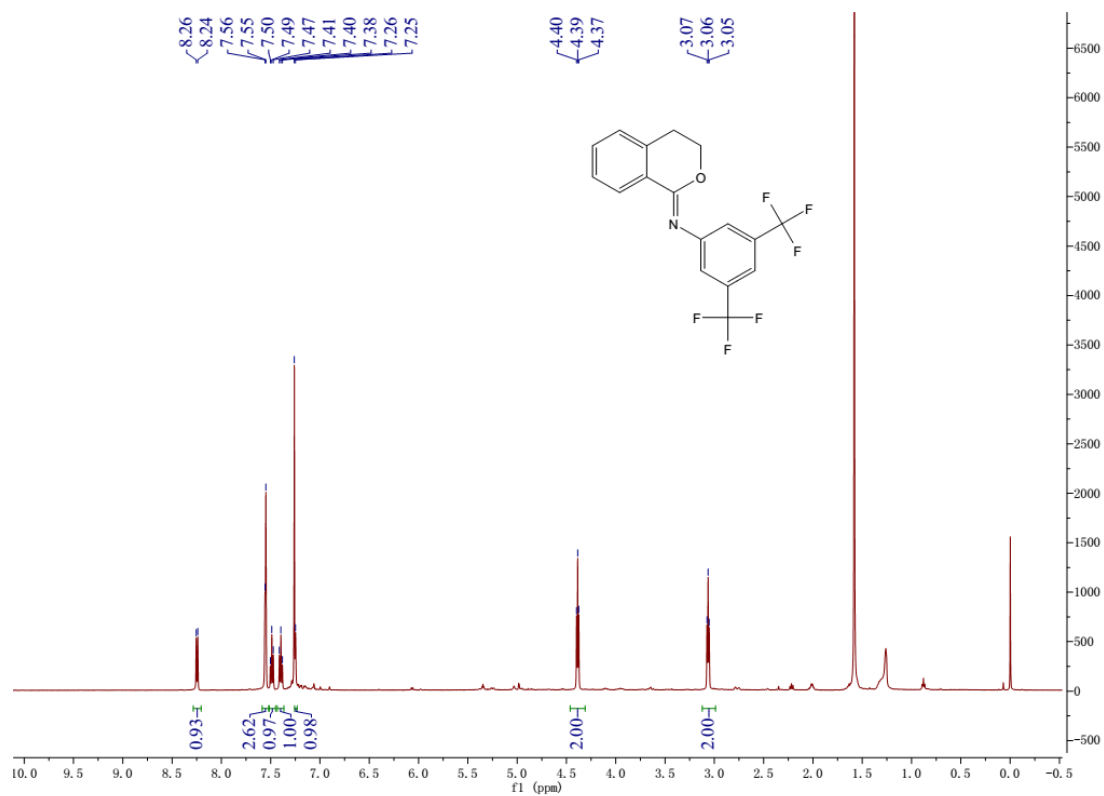

<sup>1</sup>H NMR spectrum (500 MHz, CDCl<sub>3</sub>) of **4c**

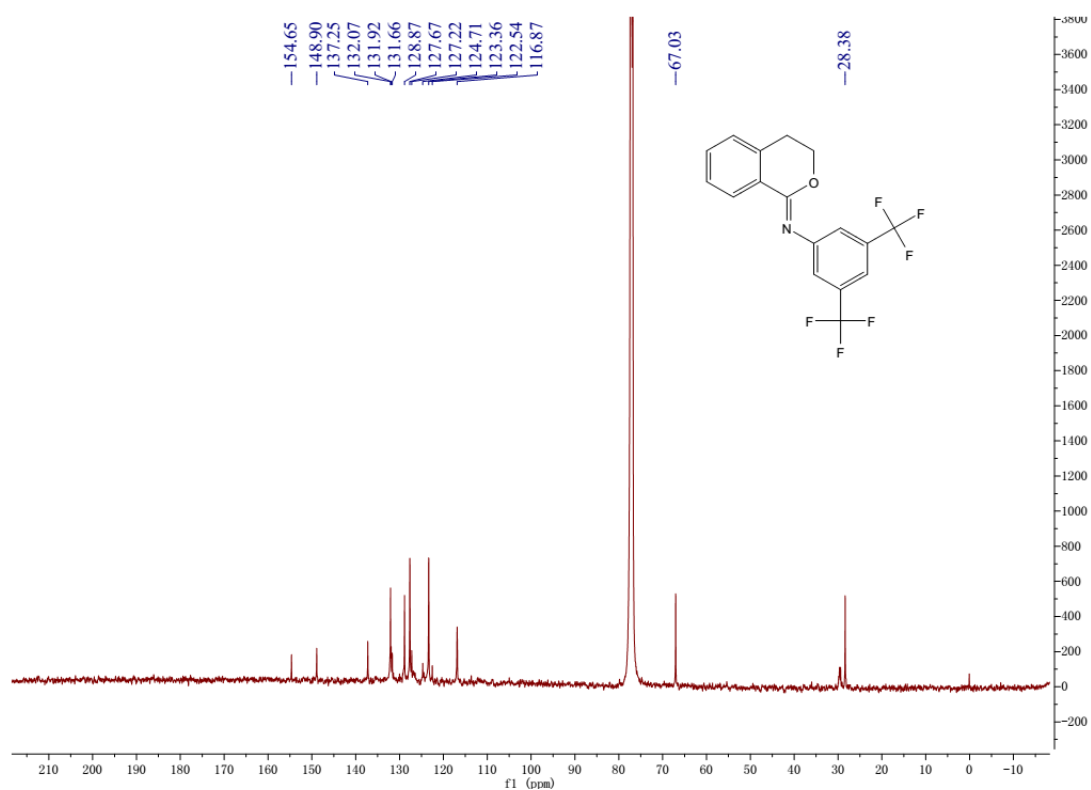

<sup>13</sup>C NMR spectrum (500 MHz, CDCl<sub>3</sub>) of **4c**

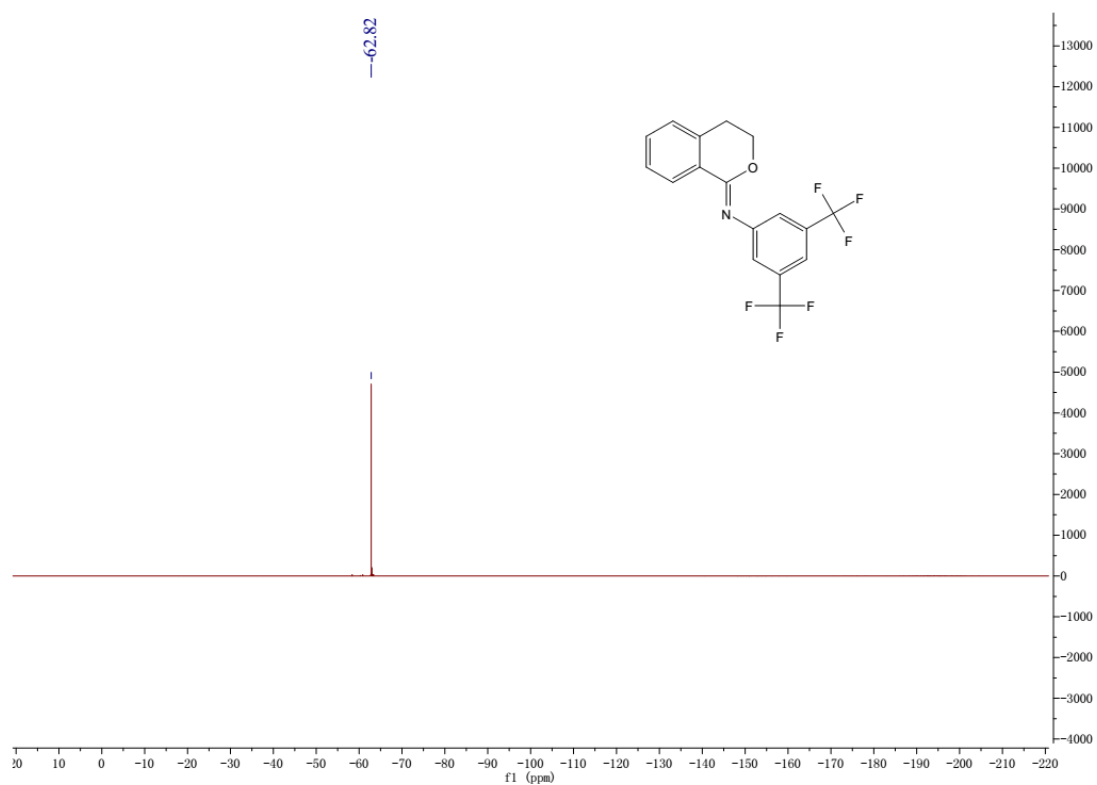 $^{19}\text{F}$  NMR spectrum (470 MHz,  $\text{CDCl}_3$ ) of **4c**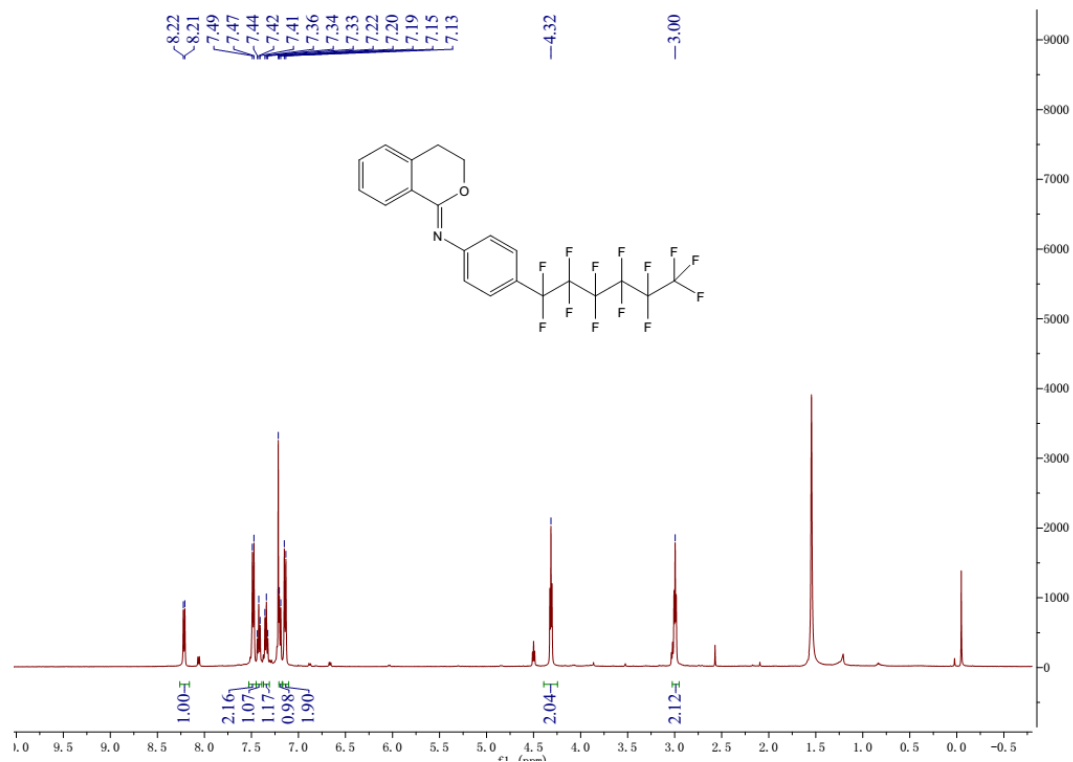 $^1\text{H}$  NMR spectrum (500 MHz,  $\text{CDCl}_3$ ) of **4e**

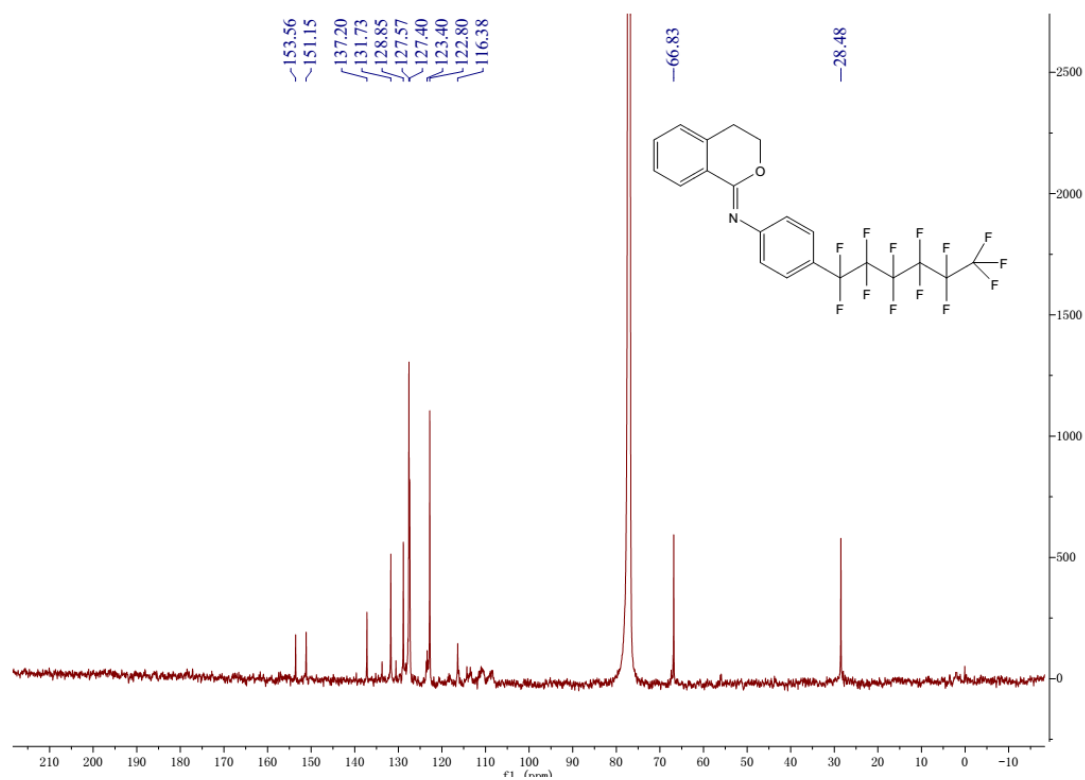

<sup>13</sup>C NMR spectrum (500 MHz, CDCl<sub>3</sub>) of **4e**

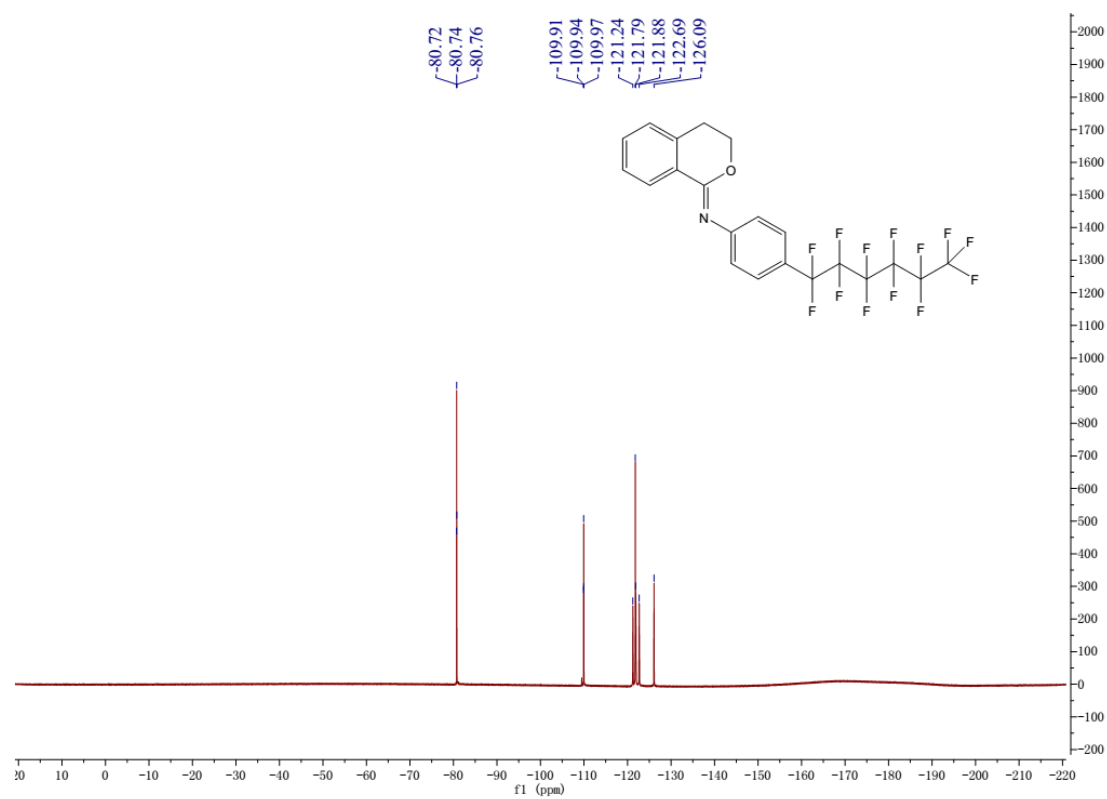

<sup>19</sup>F NMR spectrum (470 MHz, CDCl<sub>3</sub>) of **4e**
